# Supplementary material for: Integration of Biomechanical and Biological Characterization in the Development of Porous Poly(caprolactone)-Based Membranes for Abdominal Wall Hernia Treatment
Source: Hindawi journal article supplement (doi:10.1155/2018/2450176), 2018-12-09
Supplement: f1 [file 2450176.f1.pdf]

## SUPPLEMENTARY MATERIALS

### FIGURE S1

Figure S1 shows a comparison between FTIR-ATR spectra of PCL, PEG2 and PCL/PEG2 60/40 films before and after PEG2 removal. The same results have been observed for samples containing 30 % (wt) of PEG2 or PEG1 as porogen.

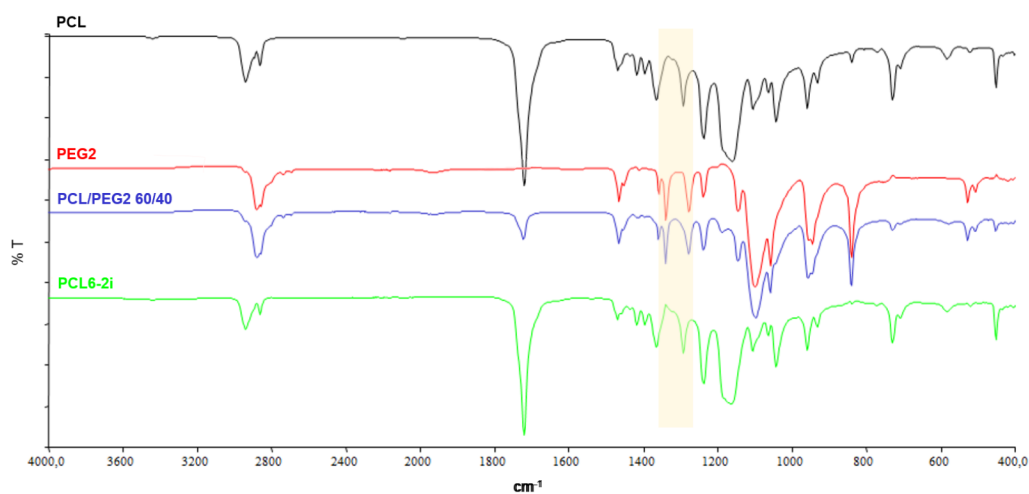

*Figure S1: FTIR-ATR spectra of PCL, PEG2 and blend films before and after PEG2 removal.*

**FIGURE S2**

Figure S2 shows the classification of proteins extracted from CMC and PCL7-2i membranes respect to their cellular localization.

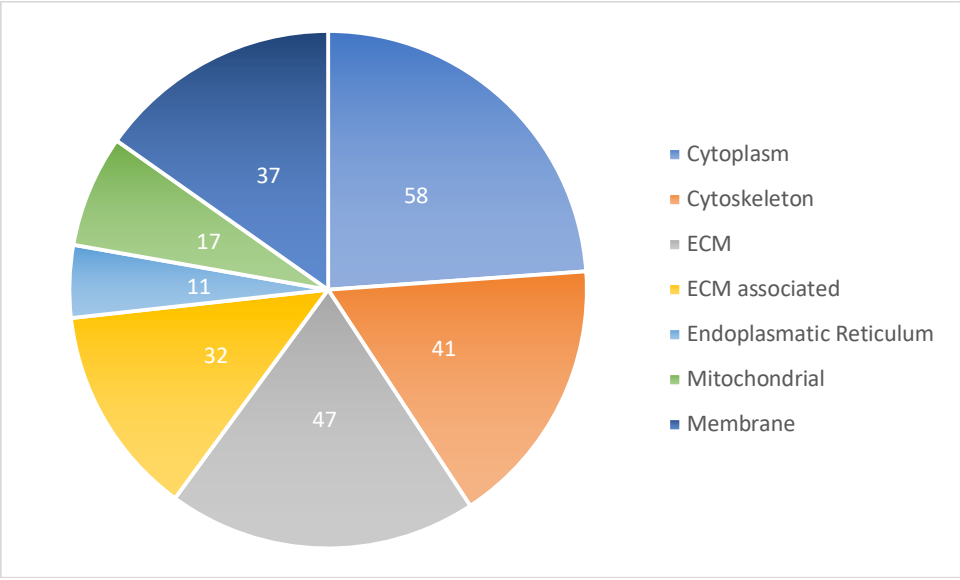

*Figure S2. ECM protein classification according to their localization.*

**TABLE S1**

Table S1 shows the 243 proteins extracted from CMC and PCL7-2i membranes and identified by the Mass Spectrometry analysis.

| N   | Score | %Cov(95)    | Uniprot Code | Gene name   | Name                                                           | Peptides(95%) | Compartment | Biological Processes                                                                                                                                                                                              | Molecular Function                                                                                                                                                                                                                                                                                                                                                                                                                                                                                                                                                                                                                                                                                             | PANTHER ID                                                               |
|-----|-------|-------------|--------------|-------------|----------------------------------------------------------------|---------------|-------------|-------------------------------------------------------------------------------------------------------------------------------------------------------------------------------------------------------------------|----------------------------------------------------------------------------------------------------------------------------------------------------------------------------------------------------------------------------------------------------------------------------------------------------------------------------------------------------------------------------------------------------------------------------------------------------------------------------------------------------------------------------------------------------------------------------------------------------------------------------------------------------------------------------------------------------------------|--------------------------------------------------------------------------|
| 197 | 5,16  | 5,432999879 | Q08211       | DHX9_HUMAN  | ATP-dependent RNA helicase A OS=Homo sapiens GN=DHX9 PE=1 SV=4 | 4             | cito        | ATP-dependent RNA helicase A (RHA) (EC 3.6.4.13) (DEAH box protein 9) (Leukophysin) (LKP) (Nuclear DNA helicase II) (NDH II)                                                                                      |                                                                                                                                                                                                                                                                                                                                                                                                                                                                                                                                                                                                                                                                                                                |                                                                          |
| 477 | 0,98  | 5,32400012  | P23526       | SAHH_HUMAN  | Adenosylhomocysteinase OS=Homo sapiens GN=AHCY PE=1 SV=4       | 2             | cyto        |                                                                                                                                                                                                                   |                                                                                                                                                                                                                                                                                                                                                                                                                                                                                                                                                                                                                                                                                                                |                                                                          |
| 73  | 16,73 | 28,79999876 | P06733       | ENOA_HUMAN  | Alpha-enolase OS=Homo sapiens GN=ENO1 PE=1 SV=2                | 8             | cyto        | Alpha-enolase (EC 4.2.1.11) (2-phospho-D-glycerate hydro-lyase) (C-myc promoter-binding protein) (Enolase 1) (MBP-1) (MPB-1) (Non-neural enolase) (NNE) (Phosphopyruvate hydratase) (Plasminogen-binding protein) | DNA binding; M band; carbohydrate metabolic process; cytoplasm; cytosol; extracellular space; extracellular vesicular exosome; gluconeogenesis; glucose metabolic process; glycolytic process; magnesium ion binding; negative regulation of cell growth; negative regulation of transcription from RNA polymerase II promoter; negative regulation of transcription, DNA-templated; nucleus; phosphopyruvate hydratase activity; phosphopyruvate hydratase complex; plasma membrane; poly(A) RNA binding; protein binding; response to virus; sequence-specific DNA binding transcription factor activity; small molecule metabolic process; transcription corepressor activity; transcription, DNA-templated | Cytoplasm. Cell membrane. Cytoplasmic myofibril sarcomere line. Nucleus. |
| 414 | 4,07  | 4,157999903 | P50995       | ANX11_HUMAN | Annexin A11 OS=Homo sapiens GN=ANXA11 PE=1 SV=1                | 2             | cyto        | Required for midbody formation and completion of the terminal phase of cytokinesis                                                                                                                                |                                                                                                                                                                                                                                                                                                                                                                                                                                                                                                                                                                                                                                                                                                                |                                                                          |
| 30  | 46,65 | 43,38999987 | P08133       | ANXA6_HUMAN | Annexin A6 OS=Homo sapiens GN=ANXA6 PE=1 SV=3                  | 24            | cyto        | May regulate the release of Ca <sup>2+</sup> from intracellular stores.                                                                                                                                           |                                                                                                                                                                                                                                                                                                                                                                                                                                                                                                                                                                                                                                                                                                                |                                                                          |

|     |       |             |        |             |                                                                                                    |    |      |                                                                                                                                                                                                                                                                |                                                                                                                                       |  |
|-----|-------|-------------|--------|-------------|----------------------------------------------------------------------------------------------------|----|------|----------------------------------------------------------------------------------------------------------------------------------------------------------------------------------------------------------------------------------------------------------------|---------------------------------------------------------------------------------------------------------------------------------------|--|
| 421 | 1,72  | 4,926000163 | Q93088 | BHMT1_HUMAN | Betaine--homocysteine S-methyltransferase 1<br>OS=Homo sapiens<br>GN=BHMT PE=1 SV=2                | 2  | cyto | Involved in the regulation of homocysteine metabolism.                                                                                                                                                                                                         |                                                                                                                                       |  |
| 270 | 3,2   | 9,459000081 | P27824 | CALX_HUMAN  | Calnexin OS=Homo sapiens<br>GN=CANX PE=1 SV=2                                                      | 3  | cyto | Calnexin (cDNA FLJ55574, highly similar to Calnexin)                                                                                                                                                                                                           |                                                                                                                                       |  |
| 220 | 4,35  | 9,091000259 | P31944 | CASPE_HUMAN | Caspase-14 OS=Homo sapiens<br>GN=CASP14 PE=1 SV=2                                                  | 3  | cyto | Non-apoptotic caspase involved in epidermal differentiation.                                                                                                                                                                                                   |                                                                                                                                       |  |
| 129 | 8,83  | 6,148999929 | Q00610 | CLH1_HUMAN  | Clathrin heavy chain 1<br>OS=Homo sapiens<br>GN=CLTC PE=1 SV=5                                     | 8  | cyto |                                                                                                                                                                                                                                                                |                                                                                                                                       |  |
| 256 | 3,7   | 10,80000028 | O75131 | CPNE3_HUMAN | Copine-3 OS=Homo sapiens<br>GN=CPNE3 PE=1 SV=1                                                     | 3  | cyto | calcium-dependent phospholipid binding; cytoplasm; cytosol; extracellular vesicular exosome; lipid metabolic process; poly(A) RNA binding; protein phosphorylation; protein serine/threonine kinase activity; transporter activity; vesicle-mediated transport |                                                                                                                                       |  |
| 219 | 4,41  | 0,961900037 | Q5D862 | FILA2_HUMAN | Filaggrin-2 OS=Homo sapiens<br>GN=FLG2 PE=1 SV=1                                                   | 2  | cyto |                                                                                                                                                                                                                                                                |                                                                                                                                       |  |
| 221 | 4,34  | 8,049999923 | Q13642 | FHL1_HUMAN  | Four and a half LIM domains protein 1<br>OS=Homo sapiens<br>GN=FHL1 PE=1 SV=4                      | 2  | cyto |                                                                                                                                                                                                                                                                |                                                                                                                                       |  |
| 44  | 24,66 | 64,17999864 | P04406 | G3P_HUMAN   | Glyceraldehyde-3-phosphate dehydrogenase<br>OS=Homo sapiens<br>GN=GAPDH PE=1 SV=3                  | 27 | cyto | Glyceraldehyde-3-phosphate dehydrogenase (EC 1.2.1.12)                                                                                                                                                                                                         |                                                                                                                                       |  |
| 160 | 6,73  | 18,06000024 | P62826 | RAN_HUMAN   | GTP-binding nuclear protein Ran OS=Homo sapiens<br>GN=RAN PE=1 SV=3                                | 4  | cyto | GTP-binding nuclear protein Ran (Fragment)                                                                                                                                                                                                                     | GTP binding; GTPase activity; intracellular protein transport; nucleocytoplasmic transport; small GTPase mediated signal transduction |  |
| 138 | 8,13  | 25,54999888 | P63244 | GBLP_HUMAN  | Guanine nucleotide-binding protein subunit beta-2-like 1<br>OS=Homo sapiens<br>GN=GNB2L1 PE=1 SV=3 | 5  | cyto | Guanine nucleotide-binding protein subunit beta-2-like 1                                                                                                                                                                                                       |                                                                                                                                       |  |
| 72  | 17,24 | 17,96000004 | P11142 | HSP7C_HUMAN | Heat shock cognate 71 kDa protein OS=Homo sapiens<br>GN=HSPA8 PE=1 SV=1                            | 10 | cyto | Heat shock cognate 71 kDa protein                                                                                                                                                                                                                              |                                                                                                                                       |  |

|     |       |             |        |             |                                                                       |    |      |                                                                                                                                                                                                |                                                                                                                                                                                                                                                                                                                      |  |
|-----|-------|-------------|--------|-------------|-----------------------------------------------------------------------|----|------|------------------------------------------------------------------------------------------------------------------------------------------------------------------------------------------------|----------------------------------------------------------------------------------------------------------------------------------------------------------------------------------------------------------------------------------------------------------------------------------------------------------------------|--|
| 131 | 8,6   | 36,10000014 | P04792 | HSPB1_HUMAN | Heat shock protein beta-1 OS=Homo sapiens GN=HSPB1 PE=1 SV=2          | 4  | cyto | Heat shock protein beta-1 (HspB1) (28 kDa heat shock protein) (Estrogen-regulated 24 kDa protein) (Heat shock 27 kDa protein) (HSP 27) (Stress-responsive protein 27) (SRP27)                  |                                                                                                                                                                                                                                                                                                                      |  |
| 524 | 3,82  | 3,962000087 | P07900 | HS90A_HUMAN | Heat shock protein HSP 90-alpha OS=Homo sapiens GN=HSP90AA1 PE=1 SV=5 | 2  | cyto | Molecular chaperone that promotes the maturation, structural maintenance and proper regulation of specific target proteins involved for instance in cell cycle control and signal transduction |                                                                                                                                                                                                                                                                                                                      |  |
| 120 | 9,38  | 10,63999981 | P08238 | HS90B_HUMAN | Heat shock protein HSP 90-beta OS=Homo sapiens GN=HSP90AB1 PE=1 SV=4  | 5  | cyto |                                                                                                                                                                                                |                                                                                                                                                                                                                                                                                                                      |  |
| 317 | 2,26  | 1,963       | P19367 | HXK1_HUMAN  | Hexokinase-1 OS=Homo sapiens GN=HK1 PE=1 SV=3                         | 2  | cyto | Hexokinase-1                                                                                                                                                                                   | ATP binding; glycolytic process; hexokinase activity                                                                                                                                                                                                                                                                 |  |
| 64  | 17,94 | 17,50999987 | Q86YZ3 | HORN_HUMAN  | Hornerin OS=Homo sapiens GN=HRNR PE=1 SV=2                            | 14 | cyto | Component of the epidermal cornified cell envelopes                                                                                                                                            |                                                                                                                                                                                                                                                                                                                      |  |
| 241 | 4     | 6,23300001  | P50502 | F10A1_HUMAN | Hsc70-interacting protein OS=Homo sapiens GN=ST13 PE=1 SV=2           | 2  | cyto |                                                                                                                                                                                                |                                                                                                                                                                                                                                                                                                                      |  |
| 95  | 12,46 | 19,68999952 | Q5T749 | KPRP_HUMAN  | Keratinocyte proline-rich protein OS=Homo sapiens GN=KPRP PE=1 SV=1   | 7  | cyto |                                                                                                                                                                                                |                                                                                                                                                                                                                                                                                                                      |  |
| 228 | 4,11  | 6,627000123 | P00338 | LDHA_HUMAN  | L-lactate dehydrogenase A chain OS=Homo sapiens GN=LDHA PE=1 SV=2     | 2  | cyto | L-lactate dehydrogenase A chain (LDH-A) (EC 1.1.1.27) (Cell proliferation-inducing gene 19 protein) (LDH muscle subunit) (LDH-M) (Renal carcinoma antigen NY-REN-59)                           | L-lactate dehydrogenase activity; cellular metabolic process; cellular response to extracellular stimulus; cilium; cytosol; extracellular vesicular exosome; glycolytic process; mitochondrion; nucleus; protein binding; pyruvate metabolic process; small molecule metabolic process; substantia nigra development |  |

|     |       |             |        |             |                                                                                           |    |      |                                                                                                                                                                                                                                          |                                                                                                                                                                                                                                                                                                                                                                                                                                                                             |  |
|-----|-------|-------------|--------|-------------|-------------------------------------------------------------------------------------------|----|------|------------------------------------------------------------------------------------------------------------------------------------------------------------------------------------------------------------------------------------------|-----------------------------------------------------------------------------------------------------------------------------------------------------------------------------------------------------------------------------------------------------------------------------------------------------------------------------------------------------------------------------------------------------------------------------------------------------------------------------|--|
| 66  | 17,67 | 20,37999928 | Q14764 | MVP_HUMAN   | Major vault protein<br>OS=Homo sapiens<br>GN=MVP PE=1 SV=4                                | 12 | cyto | Major vault protein (MVP)<br>(Lung resistance-related protein)                                                                                                                                                                           | ERBB signaling pathway; cell proliferation; cytoplasm; cytoskeleton; extracellular vesicular exosome; mRNA transport; negative regulation of protein autophosphorylation; negative regulation of protein tyrosine kinase activity; negative regulation of signaling; nuclear pore; nucleus; perinuclear region of cytoplasm; protein activation cascade; protein binding; protein kinase binding; protein phosphatase binding; protein transport; ribonucleoprotein complex |  |
| 292 | 2,72  | 16,77999943 | P21741 | MK_HUMAN    | Midkine OS=Homo sapiens<br>GN=MDK PE=1 SV=1                                               | 2  | cyto | Midkine (Fragment)                                                                                                                                                                                                                       | adrenal gland development; behavioral fear response; cell migration; cerebellar granular layer development; cerebral cortex development; defecation; dentate gyrus development; negative regulation of neuron apoptotic process; positive regulation of transcription, DNA-templated; regulation of behavior; response to drug; response to glucocorticoid; response to wounding; short-term memory                                                                         |  |
| 301 | 2,52  | 25,58000088 | P00387 | NB5R3_HUMAN | NADH-cytochrome b5 reductase 3 OS=Homo sapiens<br>GN=CYB5R3 PE=1 SV=3                     | 4  | cyto | NADH-cytochrome b5 reductase 3 (B5R)<br>(Cytochrome b5 reductase) (EC 1.6.2.2) (Diaphorase-1) [Cleaved into: NADH-cytochrome b5 reductase 3 membrane-bound form; NADH-cytochrome b5 reductase 3 soluble form]                            |                                                                                                                                                                                                                                                                                                                                                                                                                                                                             |  |
| 243 | 4     | 13,01999986 | Q13765 | NACA_HUMAN  | Nascent polypeptide-associated complex subunit alpha OS=Homo sapiens<br>GN=NACA PE=1 SV=1 | 2  | cyto | Prevents inappropriate targeting of non-secretory polypeptides to the endoplasmic reticulum (ER). Binds to nascent polypeptide chains as they emerge from the ribosome and blocks their interaction with the signal recognition particle |                                                                                                                                                                                                                                                                                                                                                                                                                                                                             |  |

|     |      |             |        |             |                                                                         |   |      |                                                                                                                                                                                                                                                                                                                                                                                                                                                                                                                                                                                           |  |  |
|-----|------|-------------|--------|-------------|-------------------------------------------------------------------------|---|------|-------------------------------------------------------------------------------------------------------------------------------------------------------------------------------------------------------------------------------------------------------------------------------------------------------------------------------------------------------------------------------------------------------------------------------------------------------------------------------------------------------------------------------------------------------------------------------------------|--|--|
| 289 | 2,85 | 17,11000055 | P15531 | NDKA_HUMAN  | Nucleoside diphosphate kinase A OS=Homo sapiens GN=NME1 PE=1 SV=1       | 2 | cyto | Major role in the synthesis of nucleoside triphosphates other than ATP.                                                                                                                                                                                                                                                                                                                                                                                                                                                                                                                   |  |  |
| 289 | 2,53 | 17,11000055 | P22392 | NDKB_HUMAN  | Nucleoside diphosphate kinase B OS=Homo sapiens GN=NME2 PE=1 SV=1       | 2 | cyto | Major role in the synthesis of nucleoside triphosphates other than ATP.                                                                                                                                                                                                                                                                                                                                                                                                                                                                                                                   |  |  |
| 174 | 6,14 | 48,48000109 | P62937 | PPIA_HUMAN  | Peptidyl-prolyl cis-trans isomerase A OS=Homo sapiens GN=PPIA PE=1 SV=2 | 6 | cyto | PPIases accelerate the folding of proteins                                                                                                                                                                                                                                                                                                                                                                                                                                                                                                                                                |  |  |
| 185 | 5,85 | 22,22000062 | P23284 | PIIB_HUMAN  | Peptidyl-prolyl cis-trans isomerase B OS=Homo sapiens GN=PIIB PE=1 SV=2 | 5 | cyto |                                                                                                                                                                                                                                                                                                                                                                                                                                                                                                                                                                                           |  |  |
| 314 | 2,32 | 13,57000023 | Q06830 | PRDX1_HUMAN | Peroxiredoxin-1 OS=Homo sapiens GN=PRDX1 PE=1 SV=1                      | 3 | cyto | cell proliferation; cytoplasm; cytosol; erythrocyte homeostasis; extracellular space; extracellular vesicular exosome; heme binding; hydrogen peroxide catabolic process; melanosome; mitochondrial matrix; natural killer cell mediated cytotoxicity; nuclear euchromatin; nucleolus; nucleus; peroxidase activity; peroxisomal matrix; poly(A) RNA binding; protein binding; regulation of NF-kappaB import into nucleus; regulation of stress-activated MAPK cascade; removal of superoxide radicals; retina homeostasis; skeletal system development; thioredoxin peroxidase activity |  |  |
| 299 | 2,6  | 4,447999969 | P36871 | PGM1_HUMAN  | Phosphoglucomutase-1 OS=Homo sapiens GN=PGM1 PE=1 SV=3                  | 2 | cyto | This enzyme participates in both the breakdown and synthesis of glucose.                                                                                                                                                                                                                                                                                                                                                                                                                                                                                                                  |  |  |
| 126 | 9,04 | 22,05999941 | P00558 | PGK1_HUMAN  | Phosphoglycerate kinase 1 OS=Homo sapiens GN=PGK1 PE=1 SV=3             | 7 | cyto | its role as a glycolytic enzyme,                                                                                                                                                                                                                                                                                                                                                                                                                                                                                                                                                          |  |  |

|     |      |             |        |             |                                                       |   |      |                                                                                                                                                                                                                                                                                                                            |  |  |
|-----|------|-------------|--------|-------------|-------------------------------------------------------|---|------|----------------------------------------------------------------------------------------------------------------------------------------------------------------------------------------------------------------------------------------------------------------------------------------------------------------------------|--|--|
| 125 | 8,37 | 64,1900003  | P0CG47 | UBB_HUMAN   | Polyubiquitin-B OS=Homo sapiens GN=UBB PE=1 SV=1      | 5 | cyto |                                                                                                                                                                                                                                                                                                                            |  |  |
| 125 | 8,37 | 64,38000202 | P0CG48 | UBC_HUMAN   | Polyubiquitin-C OS=Homo sapiens GN=UBC PE=1 SV=3      | 5 | cyto |                                                                                                                                                                                                                                                                                                                            |  |  |
| 232 | 4,05 | 38,10000122 | P31949 | S10AB_HUMAN | Protein S100-A11 OS=Homo sapiens GN=S100A11 PE=1 SV=2 | 3 | cyto | S100 protein binding; calcium ion binding; calcium-dependent protein binding; cytoplasm; extracellular space; extracellular vesicular exosome; negative regulation of DNA replication; negative regulation of cell proliferation; nucleus; protein binding; protein homodimerization activity; ruffle; signal transduction |  |  |
| 205 | 4,91 | 33,66999924 | Q99584 | S10AD_HUMAN | Protein S100-A13 OS=Homo sapiens GN=S100A13 PE=1 SV=1 | 3 | cyto | Plays a role in the export of proteins that lack a signal peptide and are secreted by an alternative pathway                                                                                                                                                                                                               |  |  |



|     |       |             |        |             |                                                                                       |    |      |                                                                                                                                                                                                                                                                                                                                                                                                                                                                                                                                                                                                                                                                                                                                                                                           |  |  |
|-----|-------|-------------|--------|-------------|---------------------------------------------------------------------------------------|----|------|-------------------------------------------------------------------------------------------------------------------------------------------------------------------------------------------------------------------------------------------------------------------------------------------------------------------------------------------------------------------------------------------------------------------------------------------------------------------------------------------------------------------------------------------------------------------------------------------------------------------------------------------------------------------------------------------------------------------------------------------------------------------------------------------|--|--|
| 45  | 23,89 | 34,63999927 | P21980 | TGM2_HUMAN  | Protein-glutamine gamma-glutamyltransferase 2<br>OS=Homo sapiens<br>GN=TGM2 PE=1 SV=2 | 17 | cyto | GTP binding; apoptotic cell clearance; blood vessel remodeling; branching involved in salivary gland morphogenesis; extracellular vesicular exosome; isopeptide cross-linking via N6-(L-isoglutamyl)-L-lysine; metal ion binding; mitochondrion; plasma membrane; positive regulation of I-kappaB kinase/NF-kappaB signaling; positive regulation of apoptotic process; positive regulation of cell adhesion; positive regulation of cytosolic calcium ion concentration involved in phospholipase C-activating G-protein coupled signaling pathway; positive regulation of inflammatory response; positive regulation of smooth muscle cell proliferation; protein binding; protein homooligomerization; protein-glutamine gamma-glutamyltransferase activity; salivary gland cavitation |  |  |
| 241 | 4     | 9,583000094 | Q8IZP2 | ST134_HUMAN | Putative protein FAM10A4<br>OS=Homo sapiens<br>GN=ST13P4 PE=5 SV=1                    | 2  | cyto |                                                                                                                                                                                                                                                                                                                                                                                                                                                                                                                                                                                                                                                                                                                                                                                           |  |  |
| 241 | 4     | 9,75600034  | Q8NFI4 | F10A5_HUMAN | Putative protein FAM10A5<br>OS=Homo sapiens<br>GN=ST13P5 PE=5 SV=1                    | 3  | cyto |                                                                                                                                                                                                                                                                                                                                                                                                                                                                                                                                                                                                                                                                                                                                                                                           |  |  |
| 31  | 43,6  | 54,24000025 | P14618 | KPYM_HUMAN  | Pyruvate kinase isozymes M1/M2 OS=Homo sapiens<br>GN=PKM PE=1 SV=4                    | 29 | cyto | Glycolytic enzyme that catalyzes the transfer of a phosphoryl group from phosphoenolpyruvate (PEP) to ADP, generating ATP                                                                                                                                                                                                                                                                                                                                                                                                                                                                                                                                                                                                                                                                 |  |  |
| 440 | 2,64  | 2,914999984 | Q59EK9 | RUN3A_HUMAN | RUN domain-containing protein 3A OS=Homo sapiens<br>GN=RUNDC3A PE=2 SV=2              | 2  | cyto |                                                                                                                                                                                                                                                                                                                                                                                                                                                                                                                                                                                                                                                                                                                                                                                           |  |  |

|     |      |             |        |             |                                                                             |   |      |                                                                                                                                             |  |  |
|-----|------|-------------|--------|-------------|-----------------------------------------------------------------------------|---|------|---------------------------------------------------------------------------------------------------------------------------------------------|--|--|
| 533 | 0,54 | 7,833000273 | O95084 | PRS23_HUMAN | Serine protease 23<br>OS=Homo sapiens<br>GN=PRSS23 PE=1 SV=1                | 2 | cyto | serine-type endopeptidase activity                                                                                                          |  |  |
| 115 | 9,73 | 27,27000117 | P60174 | TPIS_HUMAN  | Triosephosphate isomerase<br>OS=Homo sapiens<br>GN=TP11 PE=1 SV=3           | 5 | cyto |                                                                                                                                             |  |  |
| 125 | 9,06 | 43,59000027 | P62979 | RS27A_HUMAN | Ubiquitin-40S ribosomal protein S27a<br>OS=Homo sapiens GN=RPS27A PE=1 SV=2 | 6 | cyto |                                                                                                                                             |  |  |
| 125 | 8,37 | 38,28000128 | P62987 | RL40_HUMAN  | Ubiquitin-60S ribosomal protein L40<br>OS=Homo sapiens GN=UBA52 PE=1 SV=2   | 5 | cyto |                                                                                                                                             |  |  |
| 439 | 1,42 | 23,65999967 | P05109 | S10A8_HUMAN | Protein S100-A8<br>OS=Homo sapiens<br>GN=S100A8 PE=1 SV=1                   | 2 | cyto | S100A8 is a calcium- and zinc-binding protein which plays a prominent role in the regulation of inflammatory processes and immune response. |  |  |
| 183 | 5,86 | 37,72000074 | P06702 | S10A9_HUMAN | Protein S100-A9<br>OS=Homo sapiens<br>GN=S100A9 PE=1 SV=1                   | 4 | cyto | S100A9 is a calcium- and zinc-binding protein which plays a prominent role in the regulation of inflammatory processes and immune response. |  |  |
| 271 | 3,17 | 13,42999935 | Q9H0U4 | RAB1B_HUMAN | Ras-related protein Rab-1B<br>OS=Homo sapiens<br>GN=RAB1B PE=1 SV=1         | 2 | cyto |                                                                                                                                             |  |  |

|     |     |             |        |            |                                                                   |   |      |                           |                                                                                                                                                                                                                                                                                                                                                                                                                                                                                                                                                                                                                                                                                                                                                                                                                                                                                                                                                                                                                                                                                                                     |                                                                                                                                                                                                       |
|-----|-----|-------------|--------|------------|-------------------------------------------------------------------|---|------|---------------------------|---------------------------------------------------------------------------------------------------------------------------------------------------------------------------------------------------------------------------------------------------------------------------------------------------------------------------------------------------------------------------------------------------------------------------------------------------------------------------------------------------------------------------------------------------------------------------------------------------------------------------------------------------------------------------------------------------------------------------------------------------------------------------------------------------------------------------------------------------------------------------------------------------------------------------------------------------------------------------------------------------------------------------------------------------------------------------------------------------------------------|-------------------------------------------------------------------------------------------------------------------------------------------------------------------------------------------------------|
| 151 | 7,3 | 33,14999938 | P84077 | ARF1_HUMAN | ADP-ribosylation factor 1<br>OS=Homo sapiens<br>GN=ARF1 PE=1 SV=2 | 5 | cyto | ADP-ribosylation factor 1 | COP1 coating of Golgi vesicle;<br>GTP binding; GTP catabolic<br>process; GTPase activity; Golgi<br>membrane; antigen processing<br>and presentation of exogenous<br>peptide antigen via MHC class II;<br>cell junction; cellular copper ion<br>homeostasis; cytosol; dendritic<br>spine organization; extracellular<br>vesicular exosome; long term<br>synaptic depression; membrane<br>organization; neuron projection;<br>perinuclear region of cytoplasm;<br>phosphatidylinositol biosynthetic<br>process; phospholipid metabolic<br>process; plasma membrane;<br>poly(A) RNA binding; post-Golgi<br>vesicle-mediated transport;<br>postsynaptic density; postsynaptic<br>membrane; protein binding;<br>protein transport; receptor<br>signaling protein activity;<br>regulation of Arp2/3 complex-<br>mediated actin nucleation;<br>regulation of defense response to<br>virus by virus; regulation of<br>receptor internalization;<br>retrograde vesicle-mediated<br>transport, Golgi to ER;<br>sarcomere; small GTPase<br>mediated signal transduction;<br>small molecule metabolic<br>process; viral process | Golgi apparatus.<br>Cytoplasm °<br>perinuclear region.<br>Cell junction °<br>synapse °<br>synaptosome. Cell<br>junction °<br>synapse °<br>postsynaptic cell<br>membrane °<br>postsynaptic<br>density. |
| 151 | 7,3 | 33,14999938 | P61204 | ARF3_HUMAN | ADP-ribosylation factor 3<br>OS=Homo sapiens<br>GN=ARF3 PE=1 SV=2 | 5 | cyto |                           |                                                                                                                                                                                                                                                                                                                                                                                                                                                                                                                                                                                                                                                                                                                                                                                                                                                                                                                                                                                                                                                                                                                     |                                                                                                                                                                                                       |

|     |       |             |        |             |                                                                           |    |        |                                                                                                                                                                                     |                                                                                                                                                                                                                                                                                                                                                                                                                                                                                                                                                                                                         |  |
|-----|-------|-------------|--------|-------------|---------------------------------------------------------------------------|----|--------|-------------------------------------------------------------------------------------------------------------------------------------------------------------------------------------|---------------------------------------------------------------------------------------------------------------------------------------------------------------------------------------------------------------------------------------------------------------------------------------------------------------------------------------------------------------------------------------------------------------------------------------------------------------------------------------------------------------------------------------------------------------------------------------------------------|--|
| 367 | 4     | 17,21999943 | P18085 | ARF4_HUMAN  | ADP-ribosylation factor 4<br>OS=Homo sapiens<br>GN=ARF4 PE=1 SV=3         | 2  | cyto   | ADP-ribosylation factor 4                                                                                                                                                           | GTP binding; Golgi apparatus; activation of phospholipase D activity; brain development; cell migration; cytosol; epidermal growth factor receptor binding; epidermal growth factor receptor signaling pathway; extracellular vesicular exosome; negative regulation of apoptotic process; positive regulation of transcription from RNA polymerase II promoter; protein ADP-ribosylation; protein binding; protein transport; regulation of reactive oxygen species metabolic process; response to axon injury; ruffle membrane; small GTPase mediated signal transduction; vesicle-mediated transport |  |
| 171 | 6,18  | 6,291999668 | O00391 | QSOX1_HUMAN | Sulfhydryl oxidase 1<br>OS=Homo sapiens<br>GN=QSOX1 PE=1 SV=3             | 5  | cyto   | cell redox homeostasis; extracellular space; flavin-linked sulfhydryl oxidase activity; integral component of Golgi membrane; protein disulfide isomerase activity; protein folding |                                                                                                                                                                                                                                                                                                                                                                                                                                                                                                                                                                                                         |  |
| 271 | 3,17  | 13,42999935 | Q92928 | RAB1C_HUMAN | Putative Ras-related protein Rab-1C OS=Homo sapiens<br>GN=RAB1C PE=5 SV=2 | 2  | cyto   | Protein transport. Probably involved in vesicular traffic                                                                                                                           |                                                                                                                                                                                                                                                                                                                                                                                                                                                                                                                                                                                                         |  |
| 271 | 3,17  | 13,16999942 | P62820 | RAB1A_HUMAN | Ras-related protein Rab-1A<br>OS=Homo sapiens<br>GN=RAB1A PE=1 SV=3       | 2  | cyto   | The small GTPases Rab are key regulators of intracellular membrane trafficking, from the formation of transport vesicles to their fusion with membranes.                            |                                                                                                                                                                                                                                                                                                                                                                                                                                                                                                                                                                                                         |  |
| 33  | 39,22 | 11,6899997  | Q9Y490 | TLN1_HUMAN  | Talin-1 OS=Homo sapiens<br>GN=TLN1 PE=1 SV=3                              | 20 | cyto   | Probably involved in connections of major cytoskeletal structures to the plasma membrane.                                                                                           |                                                                                                                                                                                                                                                                                                                                                                                                                                                                                                                                                                                                         |  |
| 295 | 2,68  | 9,578999877 | Q14847 | LASP1_HUMAN | LIM and SH3 domain protein 1 OS=Homo sapiens<br>GN=LASP1 PE=1 SV=2        | 2  | cytosk | Plays an important role in the regulation of dynamic actin-based, cytoskeletal activities.                                                                                          |                                                                                                                                                                                                                                                                                                                                                                                                                                                                                                                                                                                                         |  |
| 465 | 1,12  | 5,033000186 | Q9NR12 | PDL17_HUMAN | PDZ and LIM domain protein 7 OS=Homo sapiens<br>GN=PDLIM7 PE=1 SV=1       | 2  | cytosk | May function as a scaffold on which the coordinated assembly of proteins can occur.                                                                                                 |                                                                                                                                                                                                                                                                                                                                                                                                                                                                                                                                                                                                         |  |

|     |       |             |        |             |                                                                    |    |        |                                                                                                                                                                                                                                                                                                                                                                                                   |  |  |
|-----|-------|-------------|--------|-------------|--------------------------------------------------------------------|----|--------|---------------------------------------------------------------------------------------------------------------------------------------------------------------------------------------------------------------------------------------------------------------------------------------------------------------------------------------------------------------------------------------------------|--|--|
| 458 | 1,17  | 61,36000156 | P62328 | TYB4_HUMAN  | Thymosin beta-4<br>OS=Homo sapiens<br>GN=TMSB4X PE=1 SV=2          | 2  | cytosk | Plays an important role in the organization of the cytoskeleton                                                                                                                                                                                                                                                                                                                                   |  |  |
| 17  | 88,09 | 72,32000232 | P08670 | VIME_HUMAN  | Vimentin OS=Homo sapiens GN=VIM PE=1 SV=4                          | 91 | cytosk |                                                                                                                                                                                                                                                                                                                                                                                                   |  |  |
| 122 | 9,34  | 9,961999953 | Q05682 | CALD1_HUMAN | Caldesmon OS=Homo sapiens GN=CALD1 PE=1 SV=3                       | 6  | cytosk | Actin- and myosin-binding protein implicated in the regulation of actomyosin interactions in smooth muscle and nonmuscle cells (could act as a bridge between myosin and actin filaments).                                                                                                                                                                                                        |  |  |
| 287 | 2,88  | 8,50699991  | P27816 | MAP4_HUMAN  | Microtubule-associated protein 4 OS=Homo sapiens GN=MAP4 PE=1 SV=3 | 4  | cytosk |                                                                                                                                                                                                                                                                                                                                                                                                   |  |  |
| 32  | 39,44 | 7,19500035  | Q15149 | PLEC_HUMAN  | Plectin OS=Homo sapiens GN=PLEC PE=1 SV=3                          | 19 | cytosk | ankyrin binding; apoptotic process; cell junction assembly; cellular component disassembly involved in execution phase of apoptosis; costamere; cytoskeleton; cytosol; extracellular matrix organization; extracellular vesicular exosome; hemidesmosome; hemidesmosome assembly; plasma membrane; poly(A) RNA binding; protein binding; sarcolemma; sarcoplasm; structural constituent of muscle |  |  |
| 50  | 22,24 | 15,57999998 | Q8WUJ3 | K1199_HUMAN | Protein KIAA1199 OS=Homo sapiens GN=KIAA1199 PE=2 SV=2             | 15 | cytosk | apoptotic process; calcium-dependent protein binding; cell cycle; cell division; cytosol; extracellular vesicular exosome; immunological synapse; melanosome; microtubule organizing center; protein binding; protein transport; viral life cycle; viral process                                                                                                                                  |  |  |

|     |       |             |        |             |                                                                |    |        |                                                                                                                                                                                                                                                                                                                                                                                    |  |  |
|-----|-------|-------------|--------|-------------|----------------------------------------------------------------|----|--------|------------------------------------------------------------------------------------------------------------------------------------------------------------------------------------------------------------------------------------------------------------------------------------------------------------------------------------------------------------------------------------|--|--|
| 210 | 4,74  | 6,177999824 | Q16181 | SEPT7_HUMAN | Septin-7 OS=Homo sapiens<br>GN=SEPT7 PE=1 SV=2                 | 3  | cytosk | GTP binding; axon terminus; axoneme; cilium morphogenesis; cleavage furrow; condensed chromosome kinetochore; cytokinesis; extracellular vesicular exosome; identical protein binding; midbody; mitosis; nucleus; protein binding; protein heterooligomerization; regulation of embryonic cell shape; septin complex; spindle; stress fiber; structural molecule activity; synapse |  |  |
| 113 | 10,01 | 38,11999857 | P05452 | TETN_HUMAN  | Tetranectin OS=Homo sapiens GN=CLEC3B<br>PE=1 SV=3             | 6  | cytosk | carbohydrate binding; ossification; skeletal system development                                                                                                                                                                                                                                                                                                                    |  |  |
| 454 | 1,21  | 9,273999929 | P67936 | TPM4_HUMAN  | Tropomyosin alpha-4 chain OS=Homo sapiens<br>GN=TPM4 PE=1 SV=3 | 2  | cytosk | Binds to actin filaments in muscle and non-muscle cells.                                                                                                                                                                                                                                                                                                                           |  |  |
| 454 | 1,14  | 8,099000156 | P07951 | TPM2_HUMAN  | Tropomyosin beta chain OS=Homo sapiens<br>GN=TPM2 PE=1 SV=1    | 2  | cytosk |                                                                                                                                                                                                                                                                                                                                                                                    |  |  |
| 39  | 31,68 | 47,45000005 | Q71U36 | TBA1A_HUMAN | Tubulin alpha-1A chain OS=Homo sapiens<br>GN=TUBA1A PE=1 SV=1  | 22 | cytosk |                                                                                                                                                                                                                                                                                                                                                                                    |  |  |
| 39  | 33,69 | 50,33000112 | P68363 | TBA1B_HUMAN | Tubulin alpha-1B chain OS=Homo sapiens<br>GN=TUBA1B PE=1 SV=1  | 23 | cytosk |                                                                                                                                                                                                                                                                                                                                                                                    |  |  |
| 365 | 29,68 | 43,88000071 | Q9BQE3 | TBA1C_HUMAN | Tubulin alpha-1C chain OS=Homo sapiens<br>GN=TUBA1C PE=1 SV=1  | 20 | cytosk |                                                                                                                                                                                                                                                                                                                                                                                    |  |  |
| 522 | 24,37 | 41,96000099 | P68366 | TBA4A_HUMAN | Tubulin alpha-4A chain OS=Homo sapiens<br>GN=TUBA4A PE=1 SV=1  | 18 | cytosk |                                                                                                                                                                                                                                                                                                                                                                                    |  |  |
| 43  | 25,08 | 43,47000122 | P07437 | TBB5_HUMAN  | Tubulin beta chain OS=Homo sapiens<br>GN=TUBB PE=1 SV=2        | 17 | cytosk |                                                                                                                                                                                                                                                                                                                                                                                    |  |  |
| 196 | 21,13 | 37,38999963 | P04350 | TBB4A_HUMAN | Tubulin beta-4A chain OS=Homo sapiens<br>GN=TUBB4A PE=1 SV=2   | 13 | cytosk |                                                                                                                                                                                                                                                                                                                                                                                    |  |  |
| 196 | 23,29 | 40,0000006  | P68371 | TBB4B_HUMAN | Tubulin beta-4B chain OS=Homo sapiens<br>GN=TUBB4B PE=1 SV=1   | 15 | cytosk |                                                                                                                                                                                                                                                                                                                                                                                    |  |  |

|     |       |              |        |             |                                                                            |    |        |                                                                                                                                                                                                 |                                                                                                                                                                                                                                                                                                                                                                                                                                                                                                                                                            |  |
|-----|-------|--------------|--------|-------------|----------------------------------------------------------------------------|----|--------|-------------------------------------------------------------------------------------------------------------------------------------------------------------------------------------------------|------------------------------------------------------------------------------------------------------------------------------------------------------------------------------------------------------------------------------------------------------------------------------------------------------------------------------------------------------------------------------------------------------------------------------------------------------------------------------------------------------------------------------------------------------------|--|
| 425 | 1,67  | 3,085999936  | P18206 | VINC_HUMAN  | Vinculin OS=Homo sapiens GN=VCL PE=1 SV=4                                  | 2  | cytosk |                                                                                                                                                                                                 |                                                                                                                                                                                                                                                                                                                                                                                                                                                                                                                                                            |  |
| 143 | 8,02  | 31,929999959 | P23528 | COF1_HUMAN  | Cofilin-1 OS=Homo sapiens GN=CFL1 PE=1 SV=3                                | 4  | cytosk | Binds to F-actin and exhibits pH-sensitive F-actin depolymerizing activity. Regulates actin cytoskeleton dynamics. Important for normal progress through mitosis and normal cytokinesis.        | actin filament depolymerization; cell projection organization; cortical actin cytoskeleton; establishment of cell polarity; lamellipodium; negative regulation of cell size; neural crest cell migration; neural fold formation; positive regulation of actin filament depolymerization; protein import into nucleus; protein phosphorylation; response to amino acid                                                                                                                                                                                      |  |
| 36  | 36,33 | 42,579999957 | P06396 | GELS_HUMAN  | Gelsolin OS=Homo sapiens GN=GSN PE=1 SV=1                                  | 31 | cytosk | Calcium-regulated, actin-modulating protein that binds to the plus (or barbed) ends of actin monomers or filaments, preventing monomer exchange (end-blocking or capping)                       |                                                                                                                                                                                                                                                                                                                                                                                                                                                                                                                                                            |  |
| 276 | 3,12  | 2,559999935  | Q15746 | MYLK_HUMAN  | Myosin light chain kinase, smooth muscle OS=Homo sapiens GN=MYLK PE=1 SV=4 | 2  | cytosk | Myosin light chain kinase, smooth muscle (MLCK) (smMLCK) (EC 2.7.11.18) (Kinase-related protein) (KRP) (Telokin) [Cleaved into: Myosin light chain kinase, smooth muscle, deglutamylation form] | ATP binding; actin filament organization; aorta smooth muscle tissue morphogenesis; bleb assembly; calmodulin-dependent protein kinase activity; cellular hypotonic response; cleavage furrow; cytoplasm; cytosol; lamellipodium; metal ion binding; muscle contraction; myosin light chain kinase activity; positive regulation of calcium ion transport; positive regulation of cell migration; positive regulation of wound healing; protein binding; protein phosphorylation; smooth muscle contraction; stress fiber; tonic smooth muscle contraction |  |
| 97  | 11,51 | 59,60000157  | P60660 | MYL6_HUMAN  | Myosin light polypeptide 6 OS=Homo sapiens GN=MYL6 PE=1 SV=2               | 7  | cytosk |                                                                                                                                                                                                 |                                                                                                                                                                                                                                                                                                                                                                                                                                                                                                                                                            |  |
| 199 | 5,11  | 23,980000062 | P19105 | ML12A_HUMAN | Myosin regulatory light chain 12A OS=Homo sapiens GN=MYL12A PE=1 SV=2      | 3  | cytosk |                                                                                                                                                                                                 |                                                                                                                                                                                                                                                                                                                                                                                                                                                                                                                                                            |  |

|     |        |             |        |             |                                                                       |    |        |                                                                                                                                                                                                                                                                                                                                                                                                                                                                                                                                                                                                                                                                                                                                                                                                                                                                                                                                                                                                                                                                 |  |  |
|-----|--------|-------------|--------|-------------|-----------------------------------------------------------------------|----|--------|-----------------------------------------------------------------------------------------------------------------------------------------------------------------------------------------------------------------------------------------------------------------------------------------------------------------------------------------------------------------------------------------------------------------------------------------------------------------------------------------------------------------------------------------------------------------------------------------------------------------------------------------------------------------------------------------------------------------------------------------------------------------------------------------------------------------------------------------------------------------------------------------------------------------------------------------------------------------------------------------------------------------------------------------------------------------|--|--|
| 199 | 5,11   | 23,83999974 | O14950 | ML12B_HUMAN | Myosin regulatory light chain 12B OS=Homo sapiens GN=MYL12B PE=1 SV=2 | 3  | cytosk |                                                                                                                                                                                                                                                                                                                                                                                                                                                                                                                                                                                                                                                                                                                                                                                                                                                                                                                                                                                                                                                                 |  |  |
| 187 | 20,74  | 8,299999684 | P35580 | MYH10_HUMAN | Myosin-10 OS=Homo sapiens GN=MYH10 PE=1 SV=3                          | 11 | cytosk | ATP binding; motor activity; myosin complex                                                                                                                                                                                                                                                                                                                                                                                                                                                                                                                                                                                                                                                                                                                                                                                                                                                                                                                                                                                                                     |  |  |
| 10  | 114,21 | 34,02999938 | P35579 | MYH9_HUMAN  | Myosin-9 OS=Homo sapiens GN=MYH9 PE=1 SV=4                            | 70 | cytosk | ADP binding; ATP binding; ATP catabolic process; ATPase activity; actin binding; actin cytoskeleton; actin cytoskeleton reorganization; actin filament binding; actin filament-based movement; actin-dependent ATPase activity; actomyosin; actomyosin contractile ring; actomyosin structure organization; angiogenesis; axon guidance; blood vessel endothelial cell migration; cell leading edge; cell-cell adherens junction; cleavage furrow; cortical cytoskeleton; cytokinesis; cytoplasm; cytosol; establishment of T cell polarity; establishment of meiotic spindle localization; extracellular vesicular exosome; immunological synapse; in utero embryonic development; integrin-mediated signaling pathway; leukocyte migration; meiotic spindle organization; membrane protein ectodomain proteolysis; microfilament motor activity; monocyte differentiation; motor activity; myoblast fusion; myosin II complex; myosin II filament; neuromuscular junction; nucleus; plasma membrane; platelet formation; poly(A) RNA binding; protein anchor; |  |  |



|     |       |             |        |             |                                                                                            |    |        |                                                                                                                                                                                                                                                                                                                                                                                                                                                                                                                                                                      |  |  |
|-----|-------|-------------|--------|-------------|--------------------------------------------------------------------------------------------|----|--------|----------------------------------------------------------------------------------------------------------------------------------------------------------------------------------------------------------------------------------------------------------------------------------------------------------------------------------------------------------------------------------------------------------------------------------------------------------------------------------------------------------------------------------------------------------------------|--|--|
|     |       |             |        |             |                                                                                            |    |        | protein binding; protein complex; protein homodimerization activity; protein transport; regulation of cell shape; ruffle; single organismal cell-cell adhesion; spindle; stress fiber; termination of G-protein coupled receptor signaling pathway; uropod; uropod organization                                                                                                                                                                                                                                                                                      |  |  |
| 144 | 8     | 21,0800007  | P29966 | MARCS_HUMAN | Myristoylated alanine-rich C-kinase substrate<br>OS=Homo sapiens<br>GN=MARCKS PE=1<br>SV=4 | 5  | cytosk | actin cytoskeleton; actin filament binding; calmodulin binding; cell cortex; centrosome; energy reserve metabolic process; extracellular vesicular exosome; germinal vesicle; plasma membrane; regulation of insulin secretion; small molecule metabolic process                                                                                                                                                                                                                                                                                                     |  |  |
| 234 | 31,26 | 36,59999967 | P68032 | ACTC_HUMAN  | Actin, alpha cardiac muscle 1<br>OS=Homo sapiens<br>GN=ACTC1 PE=1 SV=1                     | 28 | cytosk | ATP binding; ATP catabolic process; ATPase activity; I band; actin filament; actin filament-based movement; actin-myosin filament sliding; actomyosin structure organization; actomyosin, actin portion; apoptotic process; blood microparticle; cardiac muscle contraction; cardiac muscle tissue morphogenesis; cardiac myofibril assembly; cytoplasm; cytosol; extracellular space; extracellular vesicular exosome; heart contraction; muscle filament sliding; myosin binding; negative regulation of apoptotic process; response to drug; response to ethanol; |  |  |

|     |       |             |        |             |                                                                       |    |        |                                                                                                                   |                                                                                                                                                                                                                                                                                                                                                                                                                                                                                                                                                                                                                                                       |                                                                                                                   |
|-----|-------|-------------|--------|-------------|-----------------------------------------------------------------------|----|--------|-------------------------------------------------------------------------------------------------------------------|-------------------------------------------------------------------------------------------------------------------------------------------------------------------------------------------------------------------------------------------------------------------------------------------------------------------------------------------------------------------------------------------------------------------------------------------------------------------------------------------------------------------------------------------------------------------------------------------------------------------------------------------------------|-------------------------------------------------------------------------------------------------------------------|
|     |       |             |        |             |                                                                       |    |        | sarcomere; skeletal muscle thin filament assembly                                                                 |                                                                                                                                                                                                                                                                                                                                                                                                                                                                                                                                                                                                                                                       |                                                                                                                   |
| 234 | 31,28 | 42,44000018 | P68133 | ACTS_HUMAN  | Actin, alpha skeletal muscle OS=Homo sapiens GN=ACTA1 PE=1 SV=1       | 29 | cytosk |                                                                                                                   |                                                                                                                                                                                                                                                                                                                                                                                                                                                                                                                                                                                                                                                       |                                                                                                                   |
| 234 | 29,26 | 33,68999958 | P62736 | ACTA_HUMAN  | Actin, aortic smooth muscle OS=Homo sapiens GN=ACTA2 PE=1 SV=1        | 27 | cytosk |                                                                                                                   |                                                                                                                                                                                                                                                                                                                                                                                                                                                                                                                                                                                                                                                       |                                                                                                                   |
| 19  | 70,06 | 68,00000072 | P60709 | ACTB_HUMAN  | Actin, cytoplasmic 1 OS=Homo sapiens GN=ACTB PE=1 SV=1                | 77 | cytosk |                                                                                                                   |                                                                                                                                                                                                                                                                                                                                                                                                                                                                                                                                                                                                                                                       |                                                                                                                   |
| 364 | 69,88 | 67,72999763 | P63261 | ACTG_HUMAN  | Actin, cytoplasmic 2 OS=Homo sapiens GN=ACTG1 PE=1 SV=1               | 76 | cytosk |                                                                                                                   |                                                                                                                                                                                                                                                                                                                                                                                                                                                                                                                                                                                                                                                       |                                                                                                                   |
| 234 | 29,26 | 33,77999961 | P63267 | ACTH_HUMAN  | Actin, gamma-enteric smooth muscle OS=Homo sapiens GN=ACTG2 PE=1 SV=1 | 27 | cytosk |                                                                                                                   |                                                                                                                                                                                                                                                                                                                                                                                                                                                                                                                                                                                                                                                       |                                                                                                                   |
| 40  | 28,09 | 23,88000041 | P12814 | ACTN1_HUMAN | Alpha-actinin-1 OS=Homo sapiens GN=ACTN1 PE=1 SV=2                    | 15 | cytosk | Alpha-actinin-1 (Alpha-actinin cytoskeletal isoform) (F-actin cross-linking protein) (Non-muscle alpha-actinin-1) | Z disc; actin filament bundle assembly; blood coagulation; calcium ion binding; cell junction assembly; cell projection; cytoplasm; cytoskeleton; cytosol; dendritic spine; double-stranded RNA binding; extracellular matrix organization; extracellular region; extracellular vesicular exosome; fascia adherens; focal adhesion; focal adhesion assembly; integrin binding; ion channel binding; negative regulation of cellular component movement; nucleus; plasma membrane; platelet activation; platelet alpha granule lumen; platelet degranulation; protein binding; pseudopodium; regulation of apoptotic process; ruffle; vinculin binding | Cytoplasm ° cytoskeleton. Cytoplasm ° myofibril ° Z line. Cell membrane. Cell junction. Cell projection ° ruffle. |

|     |       |             |        |             |                                                                      |    |        |                                                                                                   |                                                                                                                                                                                                                                                                                                                                                                                                                                                                                                                                                                                                                                                                                                                                                                                                                                                                           |                                    |
|-----|-------|-------------|--------|-------------|----------------------------------------------------------------------|----|--------|---------------------------------------------------------------------------------------------------|---------------------------------------------------------------------------------------------------------------------------------------------------------------------------------------------------------------------------------------------------------------------------------------------------------------------------------------------------------------------------------------------------------------------------------------------------------------------------------------------------------------------------------------------------------------------------------------------------------------------------------------------------------------------------------------------------------------------------------------------------------------------------------------------------------------------------------------------------------------------------|------------------------------------|
| 135 | 21,15 | 16,35999978 | O43707 | ACTN4_HUMAN | Alpha-actinin-4 OS=Homo sapiens GN=ACTN4 PE=1 SV=2                   | 11 | cytosk | Alpha-actinin-4 (F-actin cross-linking protein) (Non-muscle alpha-actinin 4)                      | Z disc; actin binding; actin filament binding; actin filament bundle assembly; blood coagulation; calcium ion binding; cell-cell junction; cortical cytoskeleton; cytoplasm; extracellular region; extracellular vesicular exosome; integrin binding; negative regulation of cellular component movement; neuron projection; nucleoside binding; nucleus; perinuclear region of cytoplasm; platelet activation; platelet alpha granule lumen; platelet degranulation; poly(A) RNA binding; positive regulation of cellular component movement; positive regulation of pinocytosis; positive regulation of sodium:proton antiporter activity; protein binding; protein complex; protein homodimerization activity; protein transport; pseudopodium; regulation of apoptotic process; response to hypoxia; ribonucleoprotein complex; stress fiber; tight junction assembly | Nucleus. Cytoplasm. Cell junction. |
| 60  | 18,72 | 25,42000115 | Q07065 | CKAP4_HUMAN | Cytoskeleton-associated protein 4 OS=Homo sapiens GN=CKAP4 PE=1 SV=2 | 12 | cytosk | Cytoskeleton-associated protein 4 (63-kDa cytoskeleton-linking membrane protein) (Climp-63) (p63) | cytoskeleton; endoplasmic reticulum membrane; extracellular vesicular exosome; integral component of membrane; lipid particle; membrane; perinuclear region of cytoplasm; plasma membrane; poly(A) RNA binding                                                                                                                                                                                                                                                                                                                                                                                                                                                                                                                                                                                                                                                            |                                    |

|   |        |             |        |            |                                             |    |        |                                                                                                                                              |                                                                                                                                                                                                                                                                                                                                                                                                                                                                                                                                                                                                                                                                                                                                                                                                                                                                                                                                                                                                                                                                                                                                                                                                                                                                                                                                                                                                                                                      |  |
|---|--------|-------------|--------|------------|---------------------------------------------|----|--------|----------------------------------------------------------------------------------------------------------------------------------------------|------------------------------------------------------------------------------------------------------------------------------------------------------------------------------------------------------------------------------------------------------------------------------------------------------------------------------------------------------------------------------------------------------------------------------------------------------------------------------------------------------------------------------------------------------------------------------------------------------------------------------------------------------------------------------------------------------------------------------------------------------------------------------------------------------------------------------------------------------------------------------------------------------------------------------------------------------------------------------------------------------------------------------------------------------------------------------------------------------------------------------------------------------------------------------------------------------------------------------------------------------------------------------------------------------------------------------------------------------------------------------------------------------------------------------------------------------|--|
| 9 | 114,36 | 37,85000145 | P21333 | FLNA_HUMAN | Filamin-A OS=Homo sapiens GN=FLNA PE=1 SV=4 | 64 | cytosk | Filamin-A (FLN-A) (Actin-binding protein 280) (ABP-280) (Alpha-filamin) (Endothelial actin-binding protein) (Filamin-1) (Non-muscle filamin) | Fc-gamma receptor I complex binding; Myb complex; Rac GTPase binding; Ral GTPase binding; Rho GTPase binding; actin crosslink formation; actin cytoskeleton; actin cytoskeleton reorganization; actin filament; actin filament binding; adenylate cyclase-inhibiting dopamine receptor signaling pathway; apical dendrite; blood coagulation; cell junction assembly; cilium assembly; cortical cytoskeleton; cytoplasm; cytoplasmic sequestering of protein; cytosol; dendritic shaft; early endosome to late endosome transport; epithelial to mesenchymal transition; establishment of protein localization; extracellular region; extracellular vesicular exosome; glycoprotein binding; mRNA transcription from RNA polymerase II promoter; negative regulation of protein catabolic process; negative regulation of sequence-specific DNA binding transcription factor activity; neuronal cell body; nucleus; perinuclear region of cytoplasm; plasma membrane; platelet activation; platelet degranulation; poly(A) RNA binding; positive regulation of I-kappaB kinase/NF-kappaB signaling; positive regulation of transcription factor import into nucleus; protein binding; protein homodimerization activity; protein localization to cell surface; protein stabilization; receptor clustering; signal transducer activity; small GTPase binding; spindle assembly involved in mitosis; trans-Golgi network; transcription factor binding |  |
|---|--------|-------------|--------|------------|---------------------------------------------|----|--------|----------------------------------------------------------------------------------------------------------------------------------------------|------------------------------------------------------------------------------------------------------------------------------------------------------------------------------------------------------------------------------------------------------------------------------------------------------------------------------------------------------------------------------------------------------------------------------------------------------------------------------------------------------------------------------------------------------------------------------------------------------------------------------------------------------------------------------------------------------------------------------------------------------------------------------------------------------------------------------------------------------------------------------------------------------------------------------------------------------------------------------------------------------------------------------------------------------------------------------------------------------------------------------------------------------------------------------------------------------------------------------------------------------------------------------------------------------------------------------------------------------------------------------------------------------------------------------------------------------|--|

|     |        |             |        |             |                                                                                                         |     |        |                                                                                                                                        |                                                                                                                                                                                                                                                                                                                                                                                                                                                                                                                                                                                                                                                                                                                                                                                                          |  |
|-----|--------|-------------|--------|-------------|---------------------------------------------------------------------------------------------------------|-----|--------|----------------------------------------------------------------------------------------------------------------------------------------|----------------------------------------------------------------------------------------------------------------------------------------------------------------------------------------------------------------------------------------------------------------------------------------------------------------------------------------------------------------------------------------------------------------------------------------------------------------------------------------------------------------------------------------------------------------------------------------------------------------------------------------------------------------------------------------------------------------------------------------------------------------------------------------------------------|--|
| 38  | 36,61  | 12,65999973 | Q14315 | FLNC_HUMAN  | Filamin-C OS=Homo sapiens GN=FLNC PE=1 SV=3                                                             | 22  | cytosk | Filamin-C (FLN-C) (FLNc) (ABP-280-like protein) (ABP-L) (Actin-binding-like protein) (Filamin-2) (Gamma-filamin)                       | Z disc; ankyrin binding; cell junction assembly; costamere; cytoplasm; cytoskeletal protein binding; cytoskeleton; cytosol; muscle fiber development; protein binding; sarcolemma; sarcoplasm                                                                                                                                                                                                                                                                                                                                                                                                                                                                                                                                                                                                            |  |
| 94  | 12,71  | 44,78000104 | P04075 | ALDOA_HUMAN | Fructose-bisphosphate aldolase A OS=Homo sapiens GN=ALDOA PE=1 SV=2                                     | 12  | cytosk | Fructose-bisphosphate aldolase A (EC 4.1.2.13) (Lung cancer antigen NY-LU-1) (Muscle-type aldolase)                                    | ATP biosynthetic process; I band; actin binding; actin cytoskeleton; actin filament organization; blood coagulation; carbohydrate metabolic process; cytoskeletal protein binding; cytosol; extracellular region; extracellular space; extracellular vesicular exosome; fructose 1,6-bisphosphate metabolic process; fructose binding; fructose metabolic process; fructose-bisphosphate aldolase activity; gluconeogenesis; glucose metabolic process; glycolytic process; identical protein binding; muscle cell cellular homeostasis; nucleus; platelet activation; platelet alpha granule lumen; platelet degranulation; poly(A) RNA binding; protein binding; protein homotetramerization; regulation of cell shape; small molecule metabolic process; striated muscle contraction; tubulin binding |  |
| 426 | 1,66   | 3,308999911 | Q9UHI8 | ATSI_HUMAN  | A disintegrin and metalloproteinase with thrombospondin motifs 1 OS=Homo sapiens GN=ADAMTS1 PE=1 SV=4   | 2   | ECM    | Cleaves aggrecan, a cartilage proteoglycan, Active metalloprotease, which may be associated with various inflammatory processes        |                                                                                                                                                                                                                                                                                                                                                                                                                                                                                                                                                                                                                                                                                                                                                                                                          |  |
| 265 | 3,34   | 4,306000099 | P01009 | A1AT_HUMAN  | Alpha-1-antitrypsin OS=Homo sapiens GN=SERPINA1 PE=1 SV=3                                               | 2   | ECM    | Its primary target is elastase                                                                                                         |                                                                                                                                                                                                                                                                                                                                                                                                                                                                                                                                                                                                                                                                                                                                                                                                          |  |
| 3   | 241,16 | 48,1400013  | P98160 | PGBM_HUMAN  | Basement membrane-specific heparan sulfate proteoglycan core protein OS=Homo sapiens GN=HSPG2 PE=1 SV=4 | 153 | ECM    | Basement membrane-specific heparan sulfate proteoglycan core protein (HSPG) (Perlecan) (PLC) [Cleaved into: Endorepellin; LG3 peptide] |                                                                                                                                                                                                                                                                                                                                                                                                                                                                                                                                                                                                                                                                                                                                                                                                          |  |

|     |       |             |        |             |                                                                                        |     |     |                                                |  |  |
|-----|-------|-------------|--------|-------------|----------------------------------------------------------------------------------------|-----|-----|------------------------------------------------|--|--|
| 128 | 8,87  | 16,25999957 | Q66K79 | CBPZ_HUMAN  | Carboxypeptidase Z<br>OS=Homo sapiens<br>GN=CPZ PE=1 SV=2                              | 6   | ECM | Carboxypeptidase Z (CPZ)<br>(EC 3.4.17.-)      |  |  |
| 252 | 3,89  | 6,316000223 | Q76M96 | CCD80_HUMAN | Coiled-coil domain-<br>containing protein 80<br>OS=Homo sapiens<br>GN=CCDC80 PE=1 SV=1 | 4   | ECM | Promotes cell adhesion and<br>matrix assembly. |  |  |
| 18  | 73,79 | 57,51000047 | P02452 | CO1A1_HUMAN | Collagen alpha-1(I) chain<br>OS=Homo sapiens<br>GN=COL1A1 PE=1 SV=5                    | 131 | ECM |                                                |  |  |
| 261 | 3,5   | 6,187000126 | P02458 | CO2A1_HUMAN | Collagen alpha-1(II) chain<br>OS=Homo sapiens<br>GN=COL2A1 PE=1 SV=3                   | 6   | ECM |                                                |  |  |
| 116 | 9,72  | 10,36999971 | P02461 | CO3A1_HUMAN | Collagen alpha-1(III) chain<br>OS=Homo sapiens<br>GN=COL3A1 PE=1 SV=4                  | 12  | ECM |                                                |  |  |
| 146 | 7,85  | 3,055999987 | P02462 | CO4A1_HUMAN | Collagen alpha-1(IV) chain<br>OS=Homo sapiens<br>GN=COL4A1 PE=1 SV=3                   | 4   | ECM |                                                |  |  |
| 168 | 6,23  | 7,126999646 | P20908 | CO5A1_HUMAN | Collagen alpha-1(V) chain<br>OS=Homo sapiens<br>GN=COL5A1 PE=1 SV=3                    | 11  | ECM |                                                |  |  |
| 25  | 55,46 | 40,07999897 | P12109 | CO6A1_HUMAN | Collagen alpha-1(VI) chain<br>OS=Homo sapiens<br>GN=COL6A1 PE=1 SV=3                   | 49  | ECM |                                                |  |  |
| 20  | 65,59 | 20,60000002 | Q99715 | COCA1_HUMAN | Collagen alpha-1(XII)<br>chain OS=Homo sapiens<br>GN=COL12A1 PE=1<br>SV=2              | 40  | ECM |                                                |  |  |
| 412 | 1,8   | 2,521999925 | P39059 | COFA1_HUMAN | Collagen alpha-1(XV)<br>chain OS=Homo sapiens<br>GN=COL15A1 PE=1<br>SV=2               | 2   | ECM |                                                |  |  |
| 222 | 4,33  | 1,807999983 | Q07092 | COGA1_HUMAN | Collagen alpha-1(XVI)<br>chain OS=Homo sapiens<br>GN=COL16A1 PE=1<br>SV=2              | 2   | ECM |                                                |  |  |
| 23  | 57,24 | 51,16999745 | P08123 | CO1A2_HUMAN | Collagen alpha-2(I) chain<br>OS=Homo sapiens<br>GN=COL1A2 PE=1 SV=7                    | 58  | ECM |                                                |  |  |
| 264 | 3,35  | 1,576999947 | P08572 | CO4A2_HUMAN | Collagen alpha-2(IV) chain<br>OS=Homo sapiens<br>GN=COL4A2 PE=1 SV=4                   | 2   | ECM |                                                |  |  |
| 83  | 14,64 | 12,21000031 | P05997 | CO5A2_HUMAN | Collagen alpha-2(V) chain<br>OS=Homo sapiens<br>GN=COL5A2 PE=1 SV=3                    | 10  | ECM |                                                |  |  |

|     |        |             |        |             |                                                                      |     |     |                                                                                                                                                                                                                                  |                                                                                 |  |
|-----|--------|-------------|--------|-------------|----------------------------------------------------------------------|-----|-----|----------------------------------------------------------------------------------------------------------------------------------------------------------------------------------------------------------------------------------|---------------------------------------------------------------------------------|--|
| 26  | 51,98  | 33,950001   | P12110 | CO6A2_HUMAN | Collagen alpha-2(VI) chain<br>OS=Homo sapiens<br>GN=COL6A2 PE=1 SV=4 | 44  | ECM |                                                                                                                                                                                                                                  |                                                                                 |  |
| 2   | 259,93 | 51,59000158 | P12111 | CO6A3_HUMAN | Collagen alpha-3(VI) chain<br>OS=Homo sapiens<br>GN=COL6A3 PE=1 SV=5 | 193 | ECM |                                                                                                                                                                                                                                  |                                                                                 |  |
| 65  | 17,91  | 56,36000037 | P81605 | DCD_HUMAN   | Dermcidin OS=Homo sapiens<br>GN=DCD PE=1 SV=2                        | 17  | ECM | DCD-1 displays antimicrobial activity thereby limiting skin infection by potential pathogens in the first few hours after bacterial colonization                                                                                 |                                                                                 |  |
| 92  | 13,5   | 37,02000082 | P15502 | ELN_HUMAN   | Elastin OS=Homo sapiens<br>GN=ELN PE=1 SV=3                          | 9   | ECM | Elastin (Elastin (Supravalvular aortic stenosis, Williams-Beuren syndrome), isoform CRA_e)                                                                                                                                       | extracellular matrix structural constituent; proteinaceous extracellular matrix |  |
| 15  | 92,47  | 56,40000105 | Q9Y6C2 | EMIL1_HUMAN | EMILIN-1 OS=Homo sapiens<br>GN=EMILIN1 PE=1 SV=2                     | 72  | ECM | May be responsible for anchoring smooth muscle cells to elastic fibers, and may be involved not only in the formation of the elastic fiber, but also in the processes that regulate vessel assembly. Has cell adhesive capacity. |                                                                                 |  |
| 405 | 1,9    | 2,563999966 | Q9BXX0 | EMIL2_HUMAN | EMILIN-2 OS=Homo sapiens<br>GN=EMILIN2 PE=1 SV=3                     | 2   | ECM | May be responsible for anchoring smooth muscle cells to elastic fibers, and may be involved not only in the formation of the elastic fiber, but also in the processes that regulate vessel assembly                              |                                                                                 |  |

|    |        |             |        |            |                                               |     |     |                                                                                                                                                                                                                                                                                                                                                                                                                                                          |  |  |
|----|--------|-------------|--------|------------|-----------------------------------------------|-----|-----|----------------------------------------------------------------------------------------------------------------------------------------------------------------------------------------------------------------------------------------------------------------------------------------------------------------------------------------------------------------------------------------------------------------------------------------------------------|--|--|
| 6  | 151,39 | 38,73000145 | P35555 | FBN1_HUMAN | Fibrillin-1 OS=Homo sapiens GN=FBN1 PE=1 SV=3 | 100 | ECM | basement membrane; calcium ion binding; extracellular matrix disassembly; extracellular matrix organization; extracellular matrix structural constituent; extracellular region; extracellular space; heart development; kidney development; microfibril; protein binding; proteinaceous extracellular matrix; sequestering of BMP in extracellular matrix; sequestering of TGFbeta in extracellular matrix; skeletal system development                  |  |  |
| 27 | 55,12  | 15,08000046 | P35556 | FBN2_HUMAN | Fibrillin-2 OS=Homo sapiens GN=FBN2 PE=1 SV=3 | 30  | ECM | anatomical structure morphogenesis; bone trabecula formation; calcium ion binding; embryonic limb morphogenesis; extracellular matrix disassembly; extracellular matrix organization; extracellular matrix structural constituent; extracellular region; microfibril; positive regulation of bone mineralization; positive regulation of osteoblast differentiation; proteinaceous extracellular matrix; sequestering of TGFbeta in extracellular matrix |  |  |
| 1  | 442,67 | 80,22000194 | P02751 | FN1_HUMAN  | Fibronectin OS=Homo sapiens GN=FN1 PE=1 SV=4  | 527 | ECM | Fibronectins bind cell surfaces and various compounds including collagen, fibrin, heparin, DNA, and actin.                                                                                                                                                                                                                                                                                                                                               |  |  |



|    |       |             |        |             |                                                |    |     |                                                                                                                                                                                                                                                                         |                                                                                                                                                                                                                                                                                                                                                                                                                                                                                                                                                                                                                                                                                                                                                                       |                                                          |
|----|-------|-------------|--------|-------------|------------------------------------------------|----|-----|-------------------------------------------------------------------------------------------------------------------------------------------------------------------------------------------------------------------------------------------------------------------------|-----------------------------------------------------------------------------------------------------------------------------------------------------------------------------------------------------------------------------------------------------------------------------------------------------------------------------------------------------------------------------------------------------------------------------------------------------------------------------------------------------------------------------------------------------------------------------------------------------------------------------------------------------------------------------------------------------------------------------------------------------------------------|----------------------------------------------------------|
| 55 | 19,11 | 20,34000009 | P23142 | FBLN1_HUMAN | Fibulin-1 OS=Homo sapiens GN=FBLN1 PE=1 SV=4   | 11 | ECM | Fibulin-1 (FIBL-1)                                                                                                                                                                                                                                                      | basement membrane; calcium ion binding; embryo implantation; extracellular matrix organization; extracellular matrix structural constituent; extracellular region; extracellular space; peptidase activator activity; proteinaceous extracellular matrix; viral process                                                                                                                                                                                                                                                                                                                                                                                                                                                                                               |                                                          |
| 21 | 61,94 | 44,42999959 | P98095 | FBLN2_HUMAN | Fibulin-2 OS=Homo sapiens GN=FBLN2 PE=1 SV=2   | 59 | ECM | Its binding to fibronectin and some other ligands is calcium dependent. May act as an adapter that mediates the interaction between FBN1 and ELN                                                                                                                        | calcium ion binding; extracellular region                                                                                                                                                                                                                                                                                                                                                                                                                                                                                                                                                                                                                                                                                                                             |                                                          |
| 89 | 13,97 | 70,3700006  | P09382 | LEG1_HUMAN  | Galectin-1 OS=Homo sapiens GN=LGALS1 PE=1 SV=2 | 9  | ECM | Galectin-1 (Gal-1) (14 kDa laminin-binding protein) (HLBP14) (14 kDa lectin) (Beta-galactoside-binding lectin L-14-I) (Galaptin) (HBL) (HPL) (Lactose-binding lectin 1) (Lectin galactoside-binding soluble 1) (Putative MAPK-activating protein PM12) (S-Lac lectin 1) | T cell costimulation; apoptotic process; cell surface; cellular response to glucose stimulus; cellular response to organic cyclic compound; cytoplasm; extracellular space; galactoside binding; intracellular; lactose binding; multicellular organismal response to stress; myoblast differentiation; negative regulation of cell-substrate adhesion; negative regulation of neuron projection development; nucleus; plasma cell differentiation; poly(A) RNA binding; positive regulation of I-kappaB kinase/NF-kappaB signaling; positive regulation of erythrocyte aggregation; protein binding; proteinaceous extracellular matrix; regulation of apoptotic process; response to axon injury; response to drug; signal transducer activity; signal transduction | Secreted &° extracellular space &° extracellular matrix. |

|     |       |             |        |             |                                                                                                   |    |     |                                                                                                                                                                                                                                                                                                                                                          |                                                                                                                                                                                                                                                                                                                                                                                                                                                                                                                                |                                                                                        |
|-----|-------|-------------|--------|-------------|---------------------------------------------------------------------------------------------------|----|-----|----------------------------------------------------------------------------------------------------------------------------------------------------------------------------------------------------------------------------------------------------------------------------------------------------------------------------------------------------------|--------------------------------------------------------------------------------------------------------------------------------------------------------------------------------------------------------------------------------------------------------------------------------------------------------------------------------------------------------------------------------------------------------------------------------------------------------------------------------------------------------------------------------|----------------------------------------------------------------------------------------|
| 159 | 6,75  | 3,790999949 | P11047 | LAMC1_HUMAN | Laminin subunit gamma-1<br>OS=Homo sapiens<br>GN=LAMC1 PE=1 SV=3                                  | 4  | ECM | Laminin subunit gamma-1 (Laminin B2 chain) (Laminin-1 subunit gamma) (Laminin-10 subunit gamma) (Laminin-11 subunit gamma) (Laminin-2 subunit gamma) (Laminin-3 subunit gamma) (Laminin-4 subunit gamma) (Laminin-6 subunit gamma) (Laminin-7 subunit gamma) (Laminin-8 subunit gamma) (Laminin-9 subunit gamma) (S-laminin subunit gamma) (S-LAM gamma) | axon guidance; basement membrane; cell adhesion; cell migration; endoderm development; extracellular matrix disassembly; extracellular matrix organization; extracellular matrix structural constituent; extracellular region; extracellular space; extracellular vesicular exosome; glycosphingolipid binding; hemidesmosome assembly; laminin-1 complex; laminin-10 complex; laminin-11 complex; positive regulation of epithelial cell proliferation; protein complex assembly; substrate adhesion-dependent cell spreading |                                                                                        |
| 229 | 4,1   | 0,985199958 | Q8N2S1 | LTBP4_HUMAN | Latent-transforming growth factor beta-binding protein 4<br>OS=Homo sapiens<br>GN=LTBP4 PE=1 SV=2 | 2  | ECM | Latent-transforming growth factor beta-binding protein 4                                                                                                                                                                                                                                                                                                 |                                                                                                                                                                                                                                                                                                                                                                                                                                                                                                                                |                                                                                        |
| 226 | 4,18  | 3,48800011  | Q9Y4K0 | LOXL2_HUMAN | Lysyl oxidase homolog 2<br>OS=Homo sapiens<br>GN=LOXL2 PE=1 SV=1                                  | 2  | ECM |                                                                                                                                                                                                                                                                                                                                                          |                                                                                                                                                                                                                                                                                                                                                                                                                                                                                                                                |                                                                                        |
| 356 | 2,02  | 12,62000054 | P08493 | MGP_HUMAN   | Matrix Gla protein<br>OS=Homo sapiens<br>GN=MGP PE=1 SV=2                                         | 5  | ECM |                                                                                                                                                                                                                                                                                                                                                          |                                                                                                                                                                                                                                                                                                                                                                                                                                                                                                                                |                                                                                        |
| 54  | 20,24 | 8,133000135 | Q9NR99 | MXRA5_HUMAN | Matrix-remodeling-associated protein 5<br>OS=Homo sapiens<br>GN=MXRA5 PE=2 SV=3                   | 15 | ECM |                                                                                                                                                                                                                                                                                                                                                          |                                                                                                                                                                                                                                                                                                                                                                                                                                                                                                                                |                                                                                        |
| 85  | 14,38 | 39,80999887 | P35625 | TIMP3_HUMAN | Metalloproteinase inhibitor 3<br>OS=Homo sapiens<br>GN=TIMP3 PE=1 SV=2                            | 10 | ECM | Metalloproteinase inhibitor 3 (Protein MIG-5) (Tissue inhibitor of metalloproteinases 3) (TIMP-3)                                                                                                                                                                                                                                                        | basement membrane; cellular response to organic substance; metal ion binding; metalloendopeptidase inhibitor activity; negative regulation of endopeptidase activity; negative regulation of membrane protein ectodomain proteolysis; nucleus; protein binding; visual perception                                                                                                                                                                                                                                              | Secreted K149 extracellular space<br>â€œ extracellular matrix.                         |
| 47  | 23,06 | 19,13000047 | Q14112 | NID2_HUMAN  | Nidogen-2<br>OS=Homo sapiens<br>GN=NID2 PE=1 SV=3                                                 | 14 | ECM | Nidogen-2 (NID-2) (Osteonidogen)                                                                                                                                                                                                                                                                                                                         | basement membrane; basement membrane organization; calcium ion binding; cell adhesion; cell surface; cell-matrix adhesion; collagen binding; extracellular matrix organization; extracellular region; protein binding                                                                                                                                                                                                                                                                                                          | Secreted â€œ extracellular space<br>â€œ extracellular matrix<br>â€œ basement membrane. |

|     |       |             |        |             |                                                       |    |     |                                                                                                                                                                                                                                                                                                                                                                                                                                                                                                                                                                                                                                                                                               |  |  |
|-----|-------|-------------|--------|-------------|-------------------------------------------------------|----|-----|-----------------------------------------------------------------------------------------------------------------------------------------------------------------------------------------------------------------------------------------------------------------------------------------------------------------------------------------------------------------------------------------------------------------------------------------------------------------------------------------------------------------------------------------------------------------------------------------------------------------------------------------------------------------------------------------------|--|--|
| 111 | 10,15 | 8,612000197 | Q15063 | POSTN_HUMAN | Periostin OS=Homo sapiens GN=POSTN PE=1 SV=2          | 5  | ECM | Induces cell attachment and spreading and plays a role in cell adhesion                                                                                                                                                                                                                                                                                                                                                                                                                                                                                                                                                                                                                       |  |  |
| 74  | 16,37 | 11,69999987 | Q92626 | PXDN_HUMAN  | Peroxidasin homolog OS=Homo sapiens GN=PXDN PE=1 SV=2 | 10 | ECM | Plays a role in extracellular matrix formation                                                                                                                                                                                                                                                                                                                                                                                                                                                                                                                                                                                                                                                |  |  |
| 57  | 18,84 | 41,47000015 | O00622 | CYR61_HUMAN | Protein CYR61 OS=Homo sapiens GN=CYR61 PE=1 SV=1      | 15 | ECM | Promotes cell proliferation, chemotaxis, angiogenesis and cell adhesion. Appears to play a role in wound healing by up-regulating, in skin fibroblasts, the expression of a number of genes involved in angiogenesis, inflammation and matrix remodeling including VEGA-A, VEGA-C, MMP1, MMP3, TIMP1, uPA, PAI-1 and integrins alpha-3 and alpha-5                                                                                                                                                                                                                                                                                                                                            |  |  |
| 98  | 11,4  | 24,21000004 | P41221 | WNT5A_HUMAN | Protein Wnt-5a OS=Homo sapiens GN=WNT5A PE=1 SV=2     | 6  | ECM | Golgi lumen; Wnt signaling pathway; Wnt signaling pathway; calcium modulating pathway; activation of JUN kinase activity; activation of MAPK activity; activation of protein kinase B activity; ameboidal cell migration; anterior/posterior axis specification, embryo; axon guidance; canonical Wnt signaling pathway; cartilage development; cell fate commitment; cell surface; cellular protein localization; cellular response to calcium ion; cellular response to interferon-gamma; cellular response to lipopolysaccharide; cellular response to retinoic acid; cellular response to transforming growth factor beta stimulus; cervix development; clathrin-coated endocytic vesicle |  |  |

|  |  |  |  |  |  |  |  |                                                                                                                                                                                                                                                                                                                                                                                                                                                                                                                                                                                                                                                                                                                                                                                                                                                                                                                                                                                                                                                                                                                                                                                                            |  |  |
|--|--|--|--|--|--|--|--|------------------------------------------------------------------------------------------------------------------------------------------------------------------------------------------------------------------------------------------------------------------------------------------------------------------------------------------------------------------------------------------------------------------------------------------------------------------------------------------------------------------------------------------------------------------------------------------------------------------------------------------------------------------------------------------------------------------------------------------------------------------------------------------------------------------------------------------------------------------------------------------------------------------------------------------------------------------------------------------------------------------------------------------------------------------------------------------------------------------------------------------------------------------------------------------------------------|--|--|
|  |  |  |  |  |  |  |  | membrane; cochlea morphogenesis; convergent extension involved in organogenesis; dopaminergic neuron differentiation; embryonic digit morphogenesis; embryonic skeletal system development; endoplasmic reticulum lumen; epithelial cell proliferation involved in mammary gland duct elongation; epithelial to mesenchymal transition; establishment of planar polarity; extracellular region; extracellular space; extracellular vesicular exosome; face development; frizzled binding; genitalia development; heart looping; hematopoietic stem cell proliferation; hindgut morphogenesis; hypophysis morphogenesis; keratinocyte differentiation; lateral sprouting involved in mammary gland duct morphogenesis; lens development in camera-type eye; lung development; male gonad development; mammary gland branching involved in thelarche; mesenchymal-epithelial cell signaling; midgut development; negative chemotaxis; negative regulation of BMP signaling pathway; negative regulation of apoptotic process; negative regulation of axon extension involved in axon guidance; negative regulation of canonical Wnt signaling pathway; negative regulation of epithelial cell proliferation; |  |  |
|--|--|--|--|--|--|--|--|------------------------------------------------------------------------------------------------------------------------------------------------------------------------------------------------------------------------------------------------------------------------------------------------------------------------------------------------------------------------------------------------------------------------------------------------------------------------------------------------------------------------------------------------------------------------------------------------------------------------------------------------------------------------------------------------------------------------------------------------------------------------------------------------------------------------------------------------------------------------------------------------------------------------------------------------------------------------------------------------------------------------------------------------------------------------------------------------------------------------------------------------------------------------------------------------------------|--|--|

|  |  |  |  |  |  |  |  |                                                                                                                                                                                                                                                                                                                                                                                                                                                                                                                                                                                                                                                                                                                                                                                                                                                                                                                                                                                                                                                                                                                                                                                                                                                                               |  |  |
|--|--|--|--|--|--|--|--|-------------------------------------------------------------------------------------------------------------------------------------------------------------------------------------------------------------------------------------------------------------------------------------------------------------------------------------------------------------------------------------------------------------------------------------------------------------------------------------------------------------------------------------------------------------------------------------------------------------------------------------------------------------------------------------------------------------------------------------------------------------------------------------------------------------------------------------------------------------------------------------------------------------------------------------------------------------------------------------------------------------------------------------------------------------------------------------------------------------------------------------------------------------------------------------------------------------------------------------------------------------------------------|--|--|
|  |  |  |  |  |  |  |  | <p>negative regulation of fat cell differentiation; negative regulation of fibroblast growth factor receptor signaling pathway; negative regulation of mesenchymal cell proliferation; negative regulation of prostatic bud formation; negative regulation of synapse assembly; negative regulation of transcription, DNA-templated; neural tube closure; neuron differentiation; non-canonical Wnt signaling pathway via JNK cascade; olfactory bulb interneuron development; optic cup formation involved in camera-type eye development; palate development; planar cell polarity pathway involved in cardiac muscle tissue morphogenesis; planar cell polarity pathway involved in cardiac right atrium morphogenesis; planar cell polarity pathway involved in neural tube closure; planar cell polarity pathway involved in outflow tract morphogenesis; planar cell polarity pathway involved in pericardium morphogenesis; planar cell polarity pathway involved in ventricular septum morphogenesis; plasma membrane; positive regulation of JNK cascade; positive regulation of NF-kappaB transcription factor activity; positive regulation of T cell chemotaxis; positive regulation of angiogenesis; positive regulation of cGMP metabolic process; positive</p> |  |  |
|--|--|--|--|--|--|--|--|-------------------------------------------------------------------------------------------------------------------------------------------------------------------------------------------------------------------------------------------------------------------------------------------------------------------------------------------------------------------------------------------------------------------------------------------------------------------------------------------------------------------------------------------------------------------------------------------------------------------------------------------------------------------------------------------------------------------------------------------------------------------------------------------------------------------------------------------------------------------------------------------------------------------------------------------------------------------------------------------------------------------------------------------------------------------------------------------------------------------------------------------------------------------------------------------------------------------------------------------------------------------------------|--|--|

|  |  |  |  |  |  |  |  |                                                                                                                                                                                                                                                                                                                                                                                                                                                                                                                                                                                                                                                                                                                                                                                                                                                                                                                                                                                                                                                                                                                                                                                                                                                                      |  |  |
|--|--|--|--|--|--|--|--|----------------------------------------------------------------------------------------------------------------------------------------------------------------------------------------------------------------------------------------------------------------------------------------------------------------------------------------------------------------------------------------------------------------------------------------------------------------------------------------------------------------------------------------------------------------------------------------------------------------------------------------------------------------------------------------------------------------------------------------------------------------------------------------------------------------------------------------------------------------------------------------------------------------------------------------------------------------------------------------------------------------------------------------------------------------------------------------------------------------------------------------------------------------------------------------------------------------------------------------------------------------------|--|--|
|  |  |  |  |  |  |  |  | <p> regulation of cartilage development; positive regulation of cell-cell adhesion mediated by cadherin; positive regulation of chemokine biosynthetic process; positive regulation of cytokine secretion involved in immune response; positive regulation of endothelial cell migration; positive regulation of endothelial cell proliferation; positive regulation of fibroblast proliferation; positive regulation of inflammatory response; positive regulation of interferon-gamma production; positive regulation of interleukin-1 beta secretion; positive regulation of interleukin-6 production; positive regulation of interleukin-8 secretion; positive regulation of macrophage activation; positive regulation of macrophage cytokine production; positive regulation of meiosis; positive regulation of mesenchymal cell proliferation; positive regulation of neuron projection development; positive regulation of ossification; positive regulation of peptidyl-serine phosphorylation; positive regulation of peptidyl-threonine phosphorylation; positive regulation of protein catabolic process; positive regulation of protein kinase C signaling; positive regulation of response to cytokine stimulus; positive regulation of thymocyte </p> |  |  |
|--|--|--|--|--|--|--|--|----------------------------------------------------------------------------------------------------------------------------------------------------------------------------------------------------------------------------------------------------------------------------------------------------------------------------------------------------------------------------------------------------------------------------------------------------------------------------------------------------------------------------------------------------------------------------------------------------------------------------------------------------------------------------------------------------------------------------------------------------------------------------------------------------------------------------------------------------------------------------------------------------------------------------------------------------------------------------------------------------------------------------------------------------------------------------------------------------------------------------------------------------------------------------------------------------------------------------------------------------------------------|--|--|

|     |       |             |        |             |                                                                                      |    |     |                                                                                                                                                                                                                                                                                                                                                                                                                                                                                                                                                                                                                                                                                                                                                                                  |  |  |
|-----|-------|-------------|--------|-------------|--------------------------------------------------------------------------------------|----|-----|----------------------------------------------------------------------------------------------------------------------------------------------------------------------------------------------------------------------------------------------------------------------------------------------------------------------------------------------------------------------------------------------------------------------------------------------------------------------------------------------------------------------------------------------------------------------------------------------------------------------------------------------------------------------------------------------------------------------------------------------------------------------------------|--|--|
|     |       |             |        |             |                                                                                      |    |     | apoptotic process; positive regulation of transcription from RNA polymerase II promoter; positive regulation of transcription, DNA-templated; positive regulation of type I interferon-mediated signaling pathway; post-anal tail morphogenesis; primitive streak formation; protein phosphorylation; proteinaceous extracellular matrix; receptor agonist activity; receptor tyrosine kinase-like orphan receptor binding; regulation of branching involved in mammary gland duct morphogenesis; response to organic substance; sequence-specific DNA binding transcription factor activity; somitogenesis; transcription regulatory region DNA binding; type B pancreatic cell development; urinary bladder development; uterus development; vagina development; wound healing |  |  |
| 303 | 2,49  | 2,850000001 | Q9HCB6 | SPON1_HUMAN | Spondin-1 OS=Homo sapiens GN=SPON1 PE=1 SV=2                                         | 2  | ECM |                                                                                                                                                                                                                                                                                                                                                                                                                                                                                                                                                                                                                                                                                                                                                                                  |  |  |
| 154 | 7,07  | 23,04999977 | Q6UWP8 | SBSN_HUMAN  | Suprabasin OS=Homo sapiens GN=SBSN PE=2 SV=2                                         | 6  | ECM |                                                                                                                                                                                                                                                                                                                                                                                                                                                                                                                                                                                                                                                                                                                                                                                  |  |  |
| 14  | 98,19 | 38,20999861 | P24821 | TENA_HUMAN  | Tenascin OS=Homo sapiens GN=TNC PE=1 SV=3                                            | 63 | ECM |                                                                                                                                                                                                                                                                                                                                                                                                                                                                                                                                                                                                                                                                                                                                                                                  |  |  |
| 35  | 36,37 | 28,09000015 | Q6ZMP0 | THSD4_HUMAN | Thrombospondin type-1 domain-containing protein 4 OS=Homo sapiens GN=THSD4 PE=2 SV=2 | 21 | ECM | elastic fiber assembly; extracellular vesicular exosome; metalloendopeptidase activity; microfibril                                                                                                                                                                                                                                                                                                                                                                                                                                                                                                                                                                                                                                                                              |  |  |
| 207 | 4,85  | 26,37999952 | P48307 | TFPI2_HUMAN | Tissue factor pathway inhibitor 2 OS=Homo sapiens GN=TFPI2 PE=1 SV=1                 | 4  | ECM | May play a role in the regulation of plasmin-mediated matrix remodeling.                                                                                                                                                                                                                                                                                                                                                                                                                                                                                                                                                                                                                                                                                                         |  |  |

|     |       |             |        |             |                                                                                          |    |                |                                                                                                                                                 |                                                                                                                                                                                                                                                                                                                                                                     |  |
|-----|-------|-------------|--------|-------------|------------------------------------------------------------------------------------------|----|----------------|-------------------------------------------------------------------------------------------------------------------------------------------------|---------------------------------------------------------------------------------------------------------------------------------------------------------------------------------------------------------------------------------------------------------------------------------------------------------------------------------------------------------------------|--|
| 42  | 25,22 | 34,2599988  | Q15582 | BGH3_HUMAN  | Transforming growth factor-beta-induced protein ig-h3 OS=Homo sapiens GN=TGFB1 PE=1 SV=1 | 15 | ECM            | May play a role in cell-collagen interactions                                                                                                   |                                                                                                                                                                                                                                                                                                                                                                     |  |
| 77  | 15,25 | 14,84999955 | P04004 | VTNC_HUMAN  | Vitronectin OS=Homo sapiens GN=VTN PE=1 SV=1                                             | 21 | ECM            | Vitronectin is a cell adhesion and spreading factor found in serum and tissues. Vitronectin interact with glycosaminoglycans and proteoglycans. |                                                                                                                                                                                                                                                                                                                                                                     |  |
| 195 | 5,27  | 4,058999941 | Q8IUX7 | AEBP1_HUMAN | Adipocyte enhancer-binding protein 1 OS=Homo sapiens GN=AEBP1 PE=1 SV=1                  | 3  | ECM associated | Adipocyte enhancer-binding protein 1 (AE-binding protein 1) (Aortic carboxypeptidase-like protein)                                              | DNA binding; carboxypeptidase activity; cell adhesion; cytoplasm; extracellular space; extracellular vesicular exosome; metalloproteinase activity; muscle organ development; nucleus; sequence-specific DNA binding transcription factor activity; skeletal system development; transcription corepressor activity; transcription, DNA-templated; zinc ion binding |  |



|     |       |             |        |             |                                                                                                |    |                |                                                                                                                                                                                          |                                                                                                                                                                                                                                                                                                                                                                                                                                                                                                                                                                                                                                                                                                                                                                                                                                                                                                                                                                                                                                            |                                                                                           |
|-----|-------|-------------|--------|-------------|------------------------------------------------------------------------------------------------|----|----------------|------------------------------------------------------------------------------------------------------------------------------------------------------------------------------------------|--------------------------------------------------------------------------------------------------------------------------------------------------------------------------------------------------------------------------------------------------------------------------------------------------------------------------------------------------------------------------------------------------------------------------------------------------------------------------------------------------------------------------------------------------------------------------------------------------------------------------------------------------------------------------------------------------------------------------------------------------------------------------------------------------------------------------------------------------------------------------------------------------------------------------------------------------------------------------------------------------------------------------------------------|-------------------------------------------------------------------------------------------|
| 29  | 48,72 | 46,30999863 | P07355 | ANXA2_HUMAN | Annexin A2 OS=Homo sapiens GN=ANXA2 PE=1 SV=2                                                  | 39 | ECM associated | Annexin A2 (Annexin II) (Annexin-2) (Calpactin I heavy chain) (Calpactin-1 heavy chain) (Chromobindin-8) (Lipocortin II) (Placental anticoagulant protein IV) (PAP-IV) (Protein I) (p36) | S100 protein binding; Schmidt-Lanterman incisure; angiogenesis; basement membrane; body fluid secretion; calcium ion binding; calcium-dependent phospholipid binding; cell cortex; cell surface; cellular response to acid; collagen fibril organization; early endosome; extracellular space; extracellular vesicular exosome; extrinsic component of plasma membrane; fibrinolysis; lipid particle; macropinosome; melanosome; membrane budding; membrane raft assembly; midbody; myelin sheath adaxonal region; negative regulation of catalytic activity; nucleus; osteoclast development; perinuclear region of cytoplasm; phosphatidylinositol-4,5-bisphosphate binding; phospholipase A2 inhibitor activity; poly(A) RNA binding; positive regulation of binding; positive regulation of fibroblast proliferation; positive regulation of protein phosphorylation; positive regulation of vesicle fusion; protein binding; protein complex; protein heterotetramerization; protein targeting to plasma membrane; ruffle; sarcolemma | Secreted &° extracellular space &° extracellular matrix &° basement membrane. Melanosome. |
| 278 | 3,1   | 8,078999817 | P15169 | CBPN_HUMAN  | Carboxypeptidase N catalytic chain OS=Homo sapiens GN=CPN1 PE=1 SV=1                           | 2  | ECM associated |                                                                                                                                                                                          |                                                                                                                                                                                                                                                                                                                                                                                                                                                                                                                                                                                                                                                                                                                                                                                                                                                                                                                                                                                                                                            |                                                                                           |
| 181 | 6     | 24,43999946 | O94907 | DKK1_HUMAN  | Dickkopf-related protein 1 OS=Homo sapiens GN=DKK1 PE=1 SV=1                                   | 4  | ECM associated |                                                                                                                                                                                          |                                                                                                                                                                                                                                                                                                                                                                                                                                                                                                                                                                                                                                                                                                                                                                                                                                                                                                                                                                                                                                            |                                                                                           |
| 82  | 14,71 | 31,15000129 | O95967 | FBLN4_HUMAN | EGF-containing fibulin-like extracellular matrix protein 2 OS=Homo sapiens GN=EFEMP2 PE=1 SV=3 | 8  | ECM associated | EGF-containing fibulin-like extracellular matrix protein 2 (Fibulin-4) (FIBL-4) (Protein UPH1)                                                                                           | basement membrane; blood coagulation; calcium ion binding; extracellular matrix organization; extracellular matrix structural constituent; extracellular region; extracellular vesicular exosome; membrane; protein binding; transmembrane signaling receptor activity                                                                                                                                                                                                                                                                                                                                                                                                                                                                                                                                                                                                                                                                                                                                                                     | Secreted.                                                                                 |

|     |      |            |        |            |                                                                    |   |                |                                                                                                                       |                                                                                                                                                                                                                                                                                                                                                                                                                                                                                                                                                                                                                                                                                                                                                                                                                                                                                                                                                                                                                                                                                                                                                                                                                                                                                                                                                                                                                                                                                                                                                                                                                            |
|-----|------|------------|--------|------------|--------------------------------------------------------------------|---|----------------|-----------------------------------------------------------------------------------------------------------------------|----------------------------------------------------------------------------------------------------------------------------------------------------------------------------------------------------------------------------------------------------------------------------------------------------------------------------------------------------------------------------------------------------------------------------------------------------------------------------------------------------------------------------------------------------------------------------------------------------------------------------------------------------------------------------------------------------------------------------------------------------------------------------------------------------------------------------------------------------------------------------------------------------------------------------------------------------------------------------------------------------------------------------------------------------------------------------------------------------------------------------------------------------------------------------------------------------------------------------------------------------------------------------------------------------------------------------------------------------------------------------------------------------------------------------------------------------------------------------------------------------------------------------------------------------------------------------------------------------------------------------|
| 279 | 3,05 | 6,59700036 | P09038 | FGF2_HUMAN | Fibroblast growth factor 2<br>OS=Homo sapiens<br>GN=FGF2 PE=1 SV=3 | 2 | ECM associated | Fibroblast growth factor 2 (FGF-2) (Basic fibroblast growth factor) (bFGF) (Heparin-binding growth factor 2) (HBGF-2) | C21-steroid hormone biosynthetic process; Fc-epsilon receptor signaling pathway; MAPK import into nucleus; Ras protein signal transduction; activation of MAPK activity; activation of MAPKK activity; branching involved in ureteric bud morphogenesis; cell migration involved in sprouting angiogenesis; chemoattractant activity; chemotaxis; chondroblast differentiation; corticotropin hormone secreting cell differentiation; cytokine activity; cytosol; embryonic morphogenesis; epidermal growth factor receptor signaling pathway; extracellular matrix organization; extracellular region; extracellular space; fibroblast growth factor receptor binding; fibroblast growth factor receptor signaling pathway; glial cell differentiation; growth factor activity; heparin binding; hyaluronan catabolic process; innate immune response; inositol phosphate biosynthetic process; insulin receptor signaling pathway; ligand-dependent nuclear receptor transcription coactivator activity; lung development; mammary gland epithelial cell differentiation; negative regulation of blood vessel endothelial cell migration; negative regulation of cell death; negative regulation of cell growth; negative regulation of cell proliferation; negative regulation of fibroblast migration; negative regulation of transcription, DNA-templated; negative regulation of wound healing; nervous system development; neurotrophin TRK receptor signaling pathway; nucleus; organ induction; organ morphogenesis; phosphatidylinositol biosynthetic process; phosphatidylinositol-mediated signaling; positive |
|-----|------|------------|--------|------------|--------------------------------------------------------------------|---|----------------|-----------------------------------------------------------------------------------------------------------------------|----------------------------------------------------------------------------------------------------------------------------------------------------------------------------------------------------------------------------------------------------------------------------------------------------------------------------------------------------------------------------------------------------------------------------------------------------------------------------------------------------------------------------------------------------------------------------------------------------------------------------------------------------------------------------------------------------------------------------------------------------------------------------------------------------------------------------------------------------------------------------------------------------------------------------------------------------------------------------------------------------------------------------------------------------------------------------------------------------------------------------------------------------------------------------------------------------------------------------------------------------------------------------------------------------------------------------------------------------------------------------------------------------------------------------------------------------------------------------------------------------------------------------------------------------------------------------------------------------------------------------|

|  |  |  |  |  |  |  |  |  |                                                                                                                                                                                                                                                                                                                                                                                                                                                                                                                                                                                                                                                                                                                                                                                                                                                                                                                                                                                                                                                                                                                                                      |  |
|--|--|--|--|--|--|--|--|--|------------------------------------------------------------------------------------------------------------------------------------------------------------------------------------------------------------------------------------------------------------------------------------------------------------------------------------------------------------------------------------------------------------------------------------------------------------------------------------------------------------------------------------------------------------------------------------------------------------------------------------------------------------------------------------------------------------------------------------------------------------------------------------------------------------------------------------------------------------------------------------------------------------------------------------------------------------------------------------------------------------------------------------------------------------------------------------------------------------------------------------------------------|--|
|  |  |  |  |  |  |  |  |  | <p>chemotaxis; positive regulation of ERK1 and ERK2 cascade; positive regulation of angiogenesis; positive regulation of blood vessel endothelial cell migration; positive regulation of cardiac muscle cell proliferation; positive regulation of cell division; positive regulation of cell fate specification; positive regulation of cell proliferation; positive regulation of cerebellar granule cell precursor proliferation; positive regulation of endothelial cell proliferation; positive regulation of osteoblast differentiation; positive regulation of phosphatidylinositol 3-kinase activity; positive regulation of phospholipase C activity; positive regulation of transcription from RNA polymerase II promoter; positive regulation of transcription, DNA-templated; protein binding; regulation of angiogenesis; regulation of cell cycle; regulation of retinal cell programmed cell death; release of sequestered calcium ion into cytosol; response to axon injury; signal transduction; stem cell development; substantia nigra development; thyroid-stimulating hormone-secreting cell differentiation; wound healing</p> |  |
|--|--|--|--|--|--|--|--|--|------------------------------------------------------------------------------------------------------------------------------------------------------------------------------------------------------------------------------------------------------------------------------------------------------------------------------------------------------------------------------------------------------------------------------------------------------------------------------------------------------------------------------------------------------------------------------------------------------------------------------------------------------------------------------------------------------------------------------------------------------------------------------------------------------------------------------------------------------------------------------------------------------------------------------------------------------------------------------------------------------------------------------------------------------------------------------------------------------------------------------------------------------|--|

|     |       |             |        |             |                                              |    |                |                                                                                                                                                                                                                                                                                                |                                                                                                                                                                                                                                                                                                                                                                                                                                                                                                                                                                                                                                                                                                                                                                                                                                                                                                                                                                                                                                                                                                                                                                                                                                                        |  |
|-----|-------|-------------|--------|-------------|----------------------------------------------|----|----------------|------------------------------------------------------------------------------------------------------------------------------------------------------------------------------------------------------------------------------------------------------------------------------------------------|--------------------------------------------------------------------------------------------------------------------------------------------------------------------------------------------------------------------------------------------------------------------------------------------------------------------------------------------------------------------------------------------------------------------------------------------------------------------------------------------------------------------------------------------------------------------------------------------------------------------------------------------------------------------------------------------------------------------------------------------------------------------------------------------------------------------------------------------------------------------------------------------------------------------------------------------------------------------------------------------------------------------------------------------------------------------------------------------------------------------------------------------------------------------------------------------------------------------------------------------------------|--|
| 288 | 2,87  | 4,890000075 | P28799 | GRN_HUMAN   | Granulins OS=Homo sapiens GN=GRN PE=1 SV=2   | 2  | ECM associated | Granulins (Proepithelin) (PEPI) [Cleaved into: Acrogranin (Glycoprotein of 88 Kda) (Progranulin); Paragranulin; Granulin-1 (Granulin G); Granulin-2 (Granulin F); Granulin-3 (Granulin B); Granulin-4 (Granulin A); Granulin-5 (Granulin C); Granulin-6 (Granulin D); Granulin-7 (Granulin E)] |                                                                                                                                                                                                                                                                                                                                                                                                                                                                                                                                                                                                                                                                                                                                                                                                                                                                                                                                                                                                                                                                                                                                                                                                                                                        |  |
| 69  | 17,35 | 61,9599998  | O60565 | GREM1_HUMAN | Gremlin-1 OS=Homo sapiens GN=GREM1 PE=1 SV=1 | 13 | ECM associated | Gremlin-1 (Cell proliferation-inducing gene 2 protein) (Cysteine knot superfamily 1, BMP antagonist 1) (DAN domain family member 2) (Down-regulated in Mos-transformed cells protein) (Increased in high glucose protein 2) (IHG-2)                                                            | BMP binding; activation of transmembrane receptor protein tyrosine kinase activity; apoptotic process; branching involved in ureteric bud morphogenesis; cell migration involved in sprouting angiogenesis; cell morphogenesis; cell surface; cell-cell signaling; collagen fibril organization; determination of dorsal identity; embryonic limb morphogenesis; extracellular space; mesenchymal to epithelial transition involved in metanephros morphogenesis; morphogen activity; negative regulation of BMP signaling pathway; negative regulation of bone mineralization; negative regulation of bone mineralization involved in bone maturation; negative regulation of bone remodeling; negative regulation of bone trabecula formation; negative regulation of branching involved in ureteric bud morphogenesis; negative regulation of canonical Wnt signaling pathway; negative regulation of cell growth; negative regulation of monocyte chemotaxis; negative regulation of osteoblast proliferation; negative regulation of osteoclast proliferation; negative regulation of pathway-restricted SMAD protein phosphorylation; negative regulation of transcription, DNA-templated; positive regulation of NF-kappaB import into nucleus; |  |

|  |  |  |  |  |  |  |  |  |                                                                                                                                                                                                                                                                                                                                                                                                                                                                                                                                                                                                                                                                                                                                                                                                                                                                                                                                                                                                                                             |  |
|--|--|--|--|--|--|--|--|--|---------------------------------------------------------------------------------------------------------------------------------------------------------------------------------------------------------------------------------------------------------------------------------------------------------------------------------------------------------------------------------------------------------------------------------------------------------------------------------------------------------------------------------------------------------------------------------------------------------------------------------------------------------------------------------------------------------------------------------------------------------------------------------------------------------------------------------------------------------------------------------------------------------------------------------------------------------------------------------------------------------------------------------------------|--|
|  |  |  |  |  |  |  |  |  | positive regulation of NF-kappaB transcription factor activity; positive regulation of angiogenesis; positive regulation of branching involved in ureteric bud morphogenesis; positive regulation of cardiac muscle cell differentiation; positive regulation of cell proliferation; positive regulation of peptidyl-tyrosine autophosphorylation; positive regulation of receptor activity; positive regulation of receptor internalization; positive regulation of telomerase activity; positive regulation of transcription from RNA polymerase II promoter; positive regulation of transcription from RNA polymerase II promoter involved in myocardial precursor cell differentiation; protein binding; proximal/distal pattern formation; receptor agonist activity; regulation of epithelial to mesenchymal transition; regulation of focal adhesion assembly; signal transduction; transmembrane receptor protein tyrosine kinase activator activity; ureteric bud formation; vascular endothelial growth factor receptor 2 binding |  |
|--|--|--|--|--|--|--|--|--|---------------------------------------------------------------------------------------------------------------------------------------------------------------------------------------------------------------------------------------------------------------------------------------------------------------------------------------------------------------------------------------------------------------------------------------------------------------------------------------------------------------------------------------------------------------------------------------------------------------------------------------------------------------------------------------------------------------------------------------------------------------------------------------------------------------------------------------------------------------------------------------------------------------------------------------------------------------------------------------------------------------------------------------------|--|

|     |       |             |        |             |                                                                                        |    |                |                                                                                                                                                                                                                                                                                                                                                                                                                                                              |                                                                                                                         |           |
|-----|-------|-------------|--------|-------------|----------------------------------------------------------------------------------------|----|----------------|--------------------------------------------------------------------------------------------------------------------------------------------------------------------------------------------------------------------------------------------------------------------------------------------------------------------------------------------------------------------------------------------------------------------------------------------------------------|-------------------------------------------------------------------------------------------------------------------------|-----------|
| 268 | 5,34  | 5,178999901 | Q14520 | HABP2_HUMAN | Hyaluronan-binding protein 2<br>OS=Homo sapiens<br>GN=HABP2 PE=1 SV=1                  | 3  | ECM associated | Hyaluronan-binding protein 2 (EC 3.4.21.-) (Factor VII-activating protease) (Factor seven-activating protease) (FSAP) (Hepatocyte growth factor activator-like protein) (Plasma hyaluronan-binding protein) [Cleaved into: Hyaluronan-binding protein 2 50 kDa heavy chain; Hyaluronan-binding protein 2 50 kDa heavy chain alternate form; Hyaluronan-binding protein 2 27 kDa light chain; Hyaluronan-binding protein 2 27 kDa light chain alternate form] | cell adhesion; extracellular region; extracellular space; glycosaminoglycan binding; serine-type endopeptidase activity | Secreted. |
| 202 | 4,99  | 28,33000124 | P01344 | IGF2_HUMAN  | Insulin-like growth factor II<br>OS=Homo sapiens<br>GN=IGF2 PE=1 SV=1                  | 5  | ECM associated | Insulin-like growth factor II (IGF-II) (Somatomedin-A) [Cleaved into: Insulin-like growth factor II; Insulin-like growth factor II Ala-25 Del; Preptin]                                                                                                                                                                                                                                                                                                      |                                                                                                                         |           |
| 106 | 10,52 | 19,07999963 | P18065 | IBP2_HUMAN  | Insulin-like growth factor-binding protein 2<br>OS=Homo sapiens<br>GN=IGFBP2 PE=1 SV=2 | 5  | ECM associated |                                                                                                                                                                                                                                                                                                                                                                                                                                                              |                                                                                                                         |           |
| 76  | 15,68 | 39,86000121 | P17936 | IBP3_HUMAN  | Insulin-like growth factor-binding protein 3<br>OS=Homo sapiens<br>GN=IGFBP3 PE=1 SV=2 | 11 | ECM associated |                                                                                                                                                                                                                                                                                                                                                                                                                                                              |                                                                                                                         |           |
| 124 | 9,15  | 26,73999965 | P22692 | IBP4_HUMAN  | Insulin-like growth factor-binding protein 4<br>OS=Homo sapiens<br>GN=IGFBP4 PE=1 SV=2 | 5  | ECM associated |                                                                                                                                                                                                                                                                                                                                                                                                                                                              |                                                                                                                         |           |
| 53  | 20,48 | 50,37000179 | P24593 | IBP5_HUMAN  | Insulin-like growth factor-binding protein 5<br>OS=Homo sapiens<br>GN=IGFBP5 PE=1 SV=1 | 14 | ECM associated |                                                                                                                                                                                                                                                                                                                                                                                                                                                              |                                                                                                                         |           |
| 231 | 4,05  | 13,83000016 | Q16270 | IBP7_HUMAN  | Insulin-like growth factor-binding protein 7<br>OS=Homo sapiens<br>GN=IGFBP7 PE=1 SV=1 | 2  | ECM associated |                                                                                                                                                                                                                                                                                                                                                                                                                                                              |                                                                                                                         |           |

|     |       |             |        |             |                                                                                             |    |                |                                                                                                                                                                                                                                                                                                  |                                                                                                                                                                                                                                                                                                                                                                                          |  |
|-----|-------|-------------|--------|-------------|---------------------------------------------------------------------------------------------|----|----------------|--------------------------------------------------------------------------------------------------------------------------------------------------------------------------------------------------------------------------------------------------------------------------------------------------|------------------------------------------------------------------------------------------------------------------------------------------------------------------------------------------------------------------------------------------------------------------------------------------------------------------------------------------------------------------------------------------|--|
| 213 | 4,63  | 2,964000031 | P19827 | ITIH1_HUMAN | Inter-alpha-trypsin inhibitor heavy chain H1 OS=Homo sapiens GN=ITIH1 PE=1 SV=3             | 3  | ECM associated | May act as a carrier of hyaluronan in serum or as a binding protein between hyaluronan and other matrix protein, including those on cell surfaces in tissues to regulate the localization, synthesis and degradation of hyaluronan which are essential to cells undergoing biological processes. |                                                                                                                                                                                                                                                                                                                                                                                          |  |
| 71  | 17,26 | 9,831000119 | P19823 | ITIH2_HUMAN | Inter-alpha-trypsin inhibitor heavy chain H2 OS=Homo sapiens GN=ITIH2 PE=1 SV=2             | 10 | ECM associated |                                                                                                                                                                                                                                                                                                  |                                                                                                                                                                                                                                                                                                                                                                                          |  |
| 112 | 10,12 | 9,212999791 | Q06033 | ITIH3_HUMAN | Inter-alpha-trypsin inhibitor heavy chain H3 OS=Homo sapiens GN=ITIH3 PE=1 SV=2             | 7  | ECM associated |                                                                                                                                                                                                                                                                                                  |                                                                                                                                                                                                                                                                                                                                                                                          |  |
| 172 | 6,17  | 3,548000008 | Q14624 | ITIH4_HUMAN | Inter-alpha-trypsin inhibitor heavy chain H4 OS=Homo sapiens GN=ITIH4 PE=1 SV=4             | 3  | ECM associated |                                                                                                                                                                                                                                                                                                  |                                                                                                                                                                                                                                                                                                                                                                                          |  |
| 179 | 6,01  | 2,639999986 | P01042 | KNG1_HUMAN  | Kininogen-1 OS=Homo sapiens GN=KNG1 PE=1 SV=2                                               | 4  | ECM associated | Kininogens are inhibitors of thiol proteases                                                                                                                                                                                                                                                     |                                                                                                                                                                                                                                                                                                                                                                                          |  |
| 48  | 22,63 | 11,7399998  | Q14766 | LTBP1_HUMAN | Latent-transforming growth factor beta-binding protein 1 OS=Homo sapiens GN=LTBP1 PE=1 SV=4 | 12 | ECM associated | Latent-transforming growth factor beta-binding protein 1 (LTBP-1) (Transforming growth factor beta-1-binding protein 1) (TGF-beta1-BP-1)                                                                                                                                                         | calcium ion binding; extracellular matrix; extracellular matrix organization; extracellular region; protein binding; proteinaceous extracellular matrix; sequestering of TGFbeta in extracellular matrix; transforming growth factor beta binding; transforming growth factor beta-activated receptor activity; transmembrane receptor protein serine/threonine kinase signaling pathway |  |
| 180 | 6,01  | 9,329999983 | P36955 | PEDF_HUMAN  | Pigment epithelium-derived factor OS=Homo sapiens GN=SERPINF1 PE=1 SV=4                     | 3  | ECM associated | Neurotrophic protein; induces extensive neuronal differentiation in retinoblastoma cells                                                                                                                                                                                                         |                                                                                                                                                                                                                                                                                                                                                                                          |  |
| 249 | 3,98  | 12,55999953 | P37802 | TAGL2_HUMAN | Transgelin-2 OS=Homo sapiens GN=TAGLN2 PE=1 SV=3                                            | 2  | ECM associated |                                                                                                                                                                                                                                                                                                  |                                                                                                                                                                                                                                                                                                                                                                                          |  |

|     |      |             |        |             |                                                                                              |   |                |                                                                                                                                                                                                                                                     |                                                                                     |  |
|-----|------|-------------|--------|-------------|----------------------------------------------------------------------------------------------|---|----------------|-----------------------------------------------------------------------------------------------------------------------------------------------------------------------------------------------------------------------------------------------------|-------------------------------------------------------------------------------------|--|
| 208 | 4,84 | 20,70000023 | O00300 | TR11B_HUMAN | Tumor necrosis factor receptor superfamily member 11B OS=Homo sapiens GN=TNFRSF11B PE=1 SV=3 | 4 | ECM associated |                                                                                                                                                                                                                                                     |                                                                                     |  |
| 176 | 6,08 | 13,1099999  | P02647 | APOA1_HUMAN | Apolipoprotein A-I OS=Homo sapiens GN=APOA1 PE=1 SV=1                                        | 9 | ECM associated | Participates in the reverse transport of cholesterol from tissues to the liver for excretion by promoting cholesterol efflux from tissues                                                                                                           |                                                                                     |  |
| 250 | 3,92 | 0,372599997 | P04114 | APOB_HUMAN  | Apolipoprotein B-100 OS=Homo sapiens GN=APOB PE=1 SV=2                                       | 2 | ECM associated | Apolipoprotein B is a major protein constituent of chylomicrons (apo B-48), LDL (apo B-100) and VLDL (apo B-100). Apo B-100 functions as a recognition signal for the cellular binding and internalization of LDL particles by the apoB/E receptor. |                                                                                     |  |
| 247 | 4    | 19,19       | P02656 | APOC3_HUMAN | Apolipoprotein C-III OS=Homo sapiens GN=APOC3 PE=1 SV=1                                      | 2 | ECM associated | Component of triglyceride-rich very low density lipoproteins (VLDL) and high density lipoproteins (HDL) in plasma                                                                                                                                   | extracellular region; lipid binding; lipid transport; lipoprotein metabolic process |  |



|    |       |             |        |            |                                                          |    |                |                          |                                                                                                                                                                                                                                                                                                                                                                                                                                                                                                                                                                                                                                                                                                                                                                                                                                                                                                                                                                                                                                                                                                                                                                                                                                                                                                                                                                                                                                                                                                                                                                                                                                                            |           |
|----|-------|-------------|--------|------------|----------------------------------------------------------|----|----------------|--------------------------|------------------------------------------------------------------------------------------------------------------------------------------------------------------------------------------------------------------------------------------------------------------------------------------------------------------------------------------------------------------------------------------------------------------------------------------------------------------------------------------------------------------------------------------------------------------------------------------------------------------------------------------------------------------------------------------------------------------------------------------------------------------------------------------------------------------------------------------------------------------------------------------------------------------------------------------------------------------------------------------------------------------------------------------------------------------------------------------------------------------------------------------------------------------------------------------------------------------------------------------------------------------------------------------------------------------------------------------------------------------------------------------------------------------------------------------------------------------------------------------------------------------------------------------------------------------------------------------------------------------------------------------------------------|-----------|
| 91 | 13,82 | 17,98000038 | P02649 | APOE_HUMAN | Apolipoprotein E<br>OS=Homo sapiens<br>GN=APOE PE=1 SV=1 | 18 | ECM associated | Apolipoprotein E (Apo-E) | G-protein coupled receptor signaling pathway; Golgi apparatus; N-methyl-D-aspartate receptor clustering; aging; alpha-amino-3-hydroxy-5-methyl-4-isoxazole propionate selective glutamate receptor clustering; antioxidant activity; artery morphogenesis; beta-amyloid binding; blood microparticle; cGMP-mediated signaling; cell death; cellular calcium ion homeostasis; cellular response to cholesterol; cellular response to growth factor stimulus; cellular response to interleukin-1; cholesterol catabolic process; cholesterol efflux; cholesterol homeostasis; cholesterol metabolic process; cholesterol transporter activity; chylomicron; chylomicron remnant clearance; cytoplasm; cytoskeleton organization; dendrite; dendritic spine maintenance; early endosome; endocytic vesicle lumen; extracellular region; extracellular space; extracellular vesicular exosome; extrinsic component of external side of plasma membrane; fatty acid homeostasis; fibril organization; heparin binding; high-density lipoprotein particle; high-density lipoprotein particle assembly; high-density lipoprotein particle clearance; high-density lipoprotein particle remodeling; hydroxyapatite binding; identical protein binding; intermediate-density lipoprotein particle; intracellular transport; late endosome; lipid binding; lipid transporter activity; lipoprotein biosynthetic process; lipoprotein catabolic process; lipoprotein metabolic process; lipoprotein particle binding; long-chain fatty acid transport; long-chain fatty acid transporter activity; low-density lipoprotein particle; low-density lipoprotein particle | Secreted. |
|----|-------|-------------|--------|------------|----------------------------------------------------------|----|----------------|--------------------------|------------------------------------------------------------------------------------------------------------------------------------------------------------------------------------------------------------------------------------------------------------------------------------------------------------------------------------------------------------------------------------------------------------------------------------------------------------------------------------------------------------------------------------------------------------------------------------------------------------------------------------------------------------------------------------------------------------------------------------------------------------------------------------------------------------------------------------------------------------------------------------------------------------------------------------------------------------------------------------------------------------------------------------------------------------------------------------------------------------------------------------------------------------------------------------------------------------------------------------------------------------------------------------------------------------------------------------------------------------------------------------------------------------------------------------------------------------------------------------------------------------------------------------------------------------------------------------------------------------------------------------------------------------|-----------|

|  |  |  |  |  |  |  |  |  |                                                                                                                                                                                                                                                                                                                                                                                                                                                                                                                                                                                                                                                                                                                                                                                                                                                                                                                                                                                                                                                                                                                                                                                                                                                                                                                                                                                                                                                                                                                                                                                                                               |  |
|--|--|--|--|--|--|--|--|--|-------------------------------------------------------------------------------------------------------------------------------------------------------------------------------------------------------------------------------------------------------------------------------------------------------------------------------------------------------------------------------------------------------------------------------------------------------------------------------------------------------------------------------------------------------------------------------------------------------------------------------------------------------------------------------------------------------------------------------------------------------------------------------------------------------------------------------------------------------------------------------------------------------------------------------------------------------------------------------------------------------------------------------------------------------------------------------------------------------------------------------------------------------------------------------------------------------------------------------------------------------------------------------------------------------------------------------------------------------------------------------------------------------------------------------------------------------------------------------------------------------------------------------------------------------------------------------------------------------------------------------|--|
|  |  |  |  |  |  |  |  |  | receptor binding; low-density lipoprotein particle remodeling; maintenance of location in cell; metal chelating activity; negative regulation of MAP kinase activity; negative regulation of beta-amyloid formation; negative regulation of blood coagulation; negative regulation of blood vessel endothelial cell migration; negative regulation of cholesterol biosynthetic process; negative regulation of dendritic spine development; negative regulation of endothelial cell proliferation; negative regulation of inflammatory response; negative regulation of neuron apoptotic process; negative regulation of platelet activation; negative regulation of postsynaptic membrane organization; negative regulation of presynaptic membrane organization; neuronal cell body; nitric oxide mediated signal transduction; nucleus; oligodendrocyte differentiation; peripheral nervous system axon regeneration; phosphatidylcholine-sterol O-acyltransferase activator activity; phospholipid binding; phospholipid efflux; phototransduction, visible light; plasma membrane; positive regulation of axon extension; positive regulation of beta-amyloid formation; positive regulation of cGMP biosynthetic process; positive regulation of cholesterol efflux; positive regulation of cholesterol esterification; positive regulation of dendritic spine development; positive regulation of lipid biosynthetic process; positive regulation of low-density lipoprotein particle receptor catabolic process; positive regulation of membrane protein ectodomain proteolysis; positive regulation of neuron death; |  |
|--|--|--|--|--|--|--|--|--|-------------------------------------------------------------------------------------------------------------------------------------------------------------------------------------------------------------------------------------------------------------------------------------------------------------------------------------------------------------------------------------------------------------------------------------------------------------------------------------------------------------------------------------------------------------------------------------------------------------------------------------------------------------------------------------------------------------------------------------------------------------------------------------------------------------------------------------------------------------------------------------------------------------------------------------------------------------------------------------------------------------------------------------------------------------------------------------------------------------------------------------------------------------------------------------------------------------------------------------------------------------------------------------------------------------------------------------------------------------------------------------------------------------------------------------------------------------------------------------------------------------------------------------------------------------------------------------------------------------------------------|--|

|     |      |             |        |             |                                                                     |   |                |                                                                                                        |                                                                                                                                                                                                                                                                                                                                                                                                                                                                                                                                                                                                                                                                                                                                                                                                                                                                                                                                          |  |
|-----|------|-------------|--------|-------------|---------------------------------------------------------------------|---|----------------|--------------------------------------------------------------------------------------------------------|------------------------------------------------------------------------------------------------------------------------------------------------------------------------------------------------------------------------------------------------------------------------------------------------------------------------------------------------------------------------------------------------------------------------------------------------------------------------------------------------------------------------------------------------------------------------------------------------------------------------------------------------------------------------------------------------------------------------------------------------------------------------------------------------------------------------------------------------------------------------------------------------------------------------------------------|--|
|     |      |             |        |             |                                                                     |   |                |                                                                                                        | positive regulation of nitric-oxide synthase activity; protein binding; protein homodimerization activity; protein import; receptor-mediated endocytosis; regulation of Cdc42 protein signal transduction; regulation of axon extension; regulation of beta-amyloid clearance; regulation of neuron death; regulation of neuronal synaptic plasticity; regulation of protein kinase activity; response to dietary excess; response to ethanol; response to insulin; response to reactive oxygen species; response to retinoic acid; retinoid metabolic process; reverse cholesterol transport; small molecule metabolic process; synaptic transmission, cholinergic; tau protein binding; triglyceride metabolic process; vasodilation; very-low-density lipoprotein particle; very-low-density lipoprotein particle clearance; very-low-density lipoprotein particle receptor binding; very-low-density lipoprotein particle remodeling |  |
| 267 | 3,3  | 10,63999981 | O95445 | APOM_HUMAN  | Apolipoprotein M<br>OS=Homo sapiens<br>GN=APOM PE=1 SV=2            | 3 | ECM associated |                                                                                                        |                                                                                                                                                                                                                                                                                                                                                                                                                                                                                                                                                                                                                                                                                                                                                                                                                                                                                                                                          |  |
| 499 | 0,75 | 8,259999752 | P07858 | CATB_HUMAN  | Cathepsin B OS=Homo sapiens GN=CTSB PE=1 SV=3                       | 2 | ECM associated | Thiol protease which is believed to participate in intracellular degradation and turnover of proteins. |                                                                                                                                                                                                                                                                                                                                                                                                                                                                                                                                                                                                                                                                                                                                                                                                                                                                                                                                          |  |
| 258 | 3,65 | 16,43999964 | Q9NZT1 | CALL5_HUMAN | Calmodulin-like protein 5<br>OS=Homo sapiens<br>GN=CALML5 PE=1 SV=2 | 2 | ECM associated |                                                                                                        |                                                                                                                                                                                                                                                                                                                                                                                                                                                                                                                                                                                                                                                                                                                                                                                                                                                                                                                                          |  |

|     |       |             |        |             |                                                                         |   |                |                                                                                                                                                                                                                                                                     |                                                                                                                                                                                                                                                                                                                                                                                                                                                                                                                                                                                                                                                                                                                                                                                                                                                                                                                                                                                                                                                                                                                          |                                                                       |
|-----|-------|-------------|--------|-------------|-------------------------------------------------------------------------|---|----------------|---------------------------------------------------------------------------------------------------------------------------------------------------------------------------------------------------------------------------------------------------------------------|--------------------------------------------------------------------------------------------------------------------------------------------------------------------------------------------------------------------------------------------------------------------------------------------------------------------------------------------------------------------------------------------------------------------------------------------------------------------------------------------------------------------------------------------------------------------------------------------------------------------------------------------------------------------------------------------------------------------------------------------------------------------------------------------------------------------------------------------------------------------------------------------------------------------------------------------------------------------------------------------------------------------------------------------------------------------------------------------------------------------------|-----------------------------------------------------------------------|
| 109 | 10,33 | 9,283000231 | P02774 | VTDB_HUMAN  | Vitamin D-binding protein OS=Homo sapiens GN=GC PE=1 SV=1               | 8 | ECM associated | actin binding; blood microparticle; calcidiol binding; cytosol; extracellular region; lysosomal lumen; small molecule metabolic process; steroid metabolic process; vitamin D binding; vitamin D metabolic process; vitamin transport; vitamin transporter activity |                                                                                                                                                                                                                                                                                                                                                                                                                                                                                                                                                                                                                                                                                                                                                                                                                                                                                                                                                                                                                                                                                                                          |                                                                       |
| 90  | 16,13 | 19,72000003 | P11021 | GRP78_HUMAN | 78 kDa glucose-regulated protein OS=Homo sapiens GN=HSPA5 PE=1 SV=2     | 9 | er             |                                                                                                                                                                                                                                                                     |                                                                                                                                                                                                                                                                                                                                                                                                                                                                                                                                                                                                                                                                                                                                                                                                                                                                                                                                                                                                                                                                                                                          |                                                                       |
| 236 | 4,02  | 7,124000043 | Q12797 | ASPH_HUMAN  | Aspartyl/asparaginyl beta-hydroxylase OS=Homo sapiens GN=ASPH PE=1 SV=3 | 2 | er             | Aspartyl/asparaginyl beta-hydroxylase (EC 1.14.11.16) (Aspartate beta-hydroxylase) (ASP beta-hydroxylase) (Peptide-aspartate beta-dioxygenase)                                                                                                                      | activation of cysteine-type endopeptidase activity; activation of store-operated calcium channel activity; calcium channel complex; calcium ion binding; calcium ion transmembrane transport; cellular response to calcium ion; cortical endoplasmic reticulum; detection of calcium ion; electron carrier activity; endoplasmic reticulum; endoplasmic reticulum membrane; face morphogenesis; integral component of endoplasmic reticulum membrane; integral component of membrane; ion channel binding; junctional sarcoplasmic reticulum membrane; limb morphogenesis; muscle contraction; negative regulation of cell proliferation; palate development; pattern specification process; peptide-aspartate beta-dioxygenase activity; peptidyl-aspartic acid hydroxylation; plasma membrane; positive regulation of calcium ion transport into cytosol; positive regulation of intracellular protein transport; positive regulation of proteolysis; positive regulation of ryanodine-sensitive calcium-release channel activity; positive regulation of transcription, DNA-templated; protein binding; regulation of | Endoplasmic reticulum membrane; Single-pass type II membrane protein. |

|     |      |             |        |            |                                                                                                            |   |    |                                                                                                                                                                                                                          |                                                                                                                                                                                                                                                                                                                                                                                                                                                                                                                                                                                                                          |  |
|-----|------|-------------|--------|------------|------------------------------------------------------------------------------------------------------------|---|----|--------------------------------------------------------------------------------------------------------------------------------------------------------------------------------------------------------------------------|--------------------------------------------------------------------------------------------------------------------------------------------------------------------------------------------------------------------------------------------------------------------------------------------------------------------------------------------------------------------------------------------------------------------------------------------------------------------------------------------------------------------------------------------------------------------------------------------------------------------------|--|
|     |      |             |        |            |                                                                                                            |   |    |                                                                                                                                                                                                                          | cardiac muscle contraction by regulation of the release of sequestered calcium ion; regulation of cell communication by electrical coupling; regulation of inositol 1,4,5-trisphosphate-sensitive calcium-release channel activity; regulation of protein depolymerization; regulation of protein stability; regulation of release of sequestered calcium ion into cytosol by sarcoplasmic reticulum; regulation of ryanodine-sensitive calcium-release channel activity; response to ATP; sarcoplasmic reticulum lumen; sarcoplasmic reticulum membrane; structural constituent of muscle; structural molecule activity |  |
| 493 | 0,81 | 12,47000024 | P27797 | CALR_HUMAN | Calreticulin OS=Homo sapiens GN=CALR PE=1 SV=1                                                             | 3 | cr | Calreticulin (CRP55) (Calregulin) (Endoplasmic reticulum resident protein 60) (ERp60) (HACBP) (grp60)                                                                                                                    |                                                                                                                                                                                                                                                                                                                                                                                                                                                                                                                                                                                                                          |  |
| 194 | 5,35 | 13,95000007 | P04844 | RPN2_HUMAN | Dolichyl-diphosphooligosaccharide--protein glycosyltransferase subunit 2 OS=Homo sapiens GN=RPN2 PE=1 SV=3 | 4 | cr | Dolichyl-diphosphooligosaccharide--protein glycosyltransferase subunit 2 (EC 2.4.99.18) (Dolichyl-diphosphooligosaccharide--protein glycosyltransferase 63 kDa subunit) (RIBIIR) (Ribophorin II) (RPN-II) (Ribophorin-2) | SRP-dependent cotranslational protein targeting to membrane; aging; autophagic vacuole membrane; cellular protein metabolic process; cellular protein modification process; endoplasmic reticulum membrane; gene expression; integral component of membrane; oligosaccharyltransferase complex; post-translational protein modification; protein N-linked glycosylation via asparagine; response to drug; ribosome binding; rough endoplasmic reticulum; transferase activity, transferring glycosyl groups; translation                                                                                                 |  |

|     |        |             |        |             |                                                                                         |    |    |                                                                                                                                              |                                                                                                                                                                                                                                                                                                                                                                                                                                                                                                                                                                                                                                                                                                                                                                                                                                                                                                                                                              |                                          |
|-----|--------|-------------|--------|-------------|-----------------------------------------------------------------------------------------|----|----|----------------------------------------------------------------------------------------------------------------------------------------------|--------------------------------------------------------------------------------------------------------------------------------------------------------------------------------------------------------------------------------------------------------------------------------------------------------------------------------------------------------------------------------------------------------------------------------------------------------------------------------------------------------------------------------------------------------------------------------------------------------------------------------------------------------------------------------------------------------------------------------------------------------------------------------------------------------------------------------------------------------------------------------------------------------------------------------------------------------------|------------------------------------------|
| 198 | 7,35   | 6,475999951 | P14625 | ENPL_HUMAN  | Endoplasmin OS=Homo sapiens GN=HSP90B1 PE=1 SV=1                                        | 5  | er | Endoplasmin (94 kDa glucose-regulated protein) (GRP-94) (Heat shock protein 90 kDa beta member 1) (Tumor rejection antigen 1) (gp96 homolog) | ATP binding; ER-associated ubiquitin-dependent protein catabolic process; RNA binding; actin rod assembly; activation of signaling protein activity involved in unfolded protein response; calcium ion binding; cellular protein metabolic process; cellular response to ATP; cytosol; endocytic vesicle lumen; endoplasmic reticulum; endoplasmic reticulum lumen; endoplasmic reticulum membrane; endoplasmic reticulum unfolded protein response; extracellular region; extracellular vesicular exosome; innate immune response; low-density lipoprotein particle receptor binding; melanosome; midbody; negative regulation of apoptotic process; nucleus; perinuclear region of cytoplasm; plasma membrane; protein binding; protein folding; protein phosphatase binding; protein transport; regulation of phosphoprotein phosphatase activity; response to hypoxia; sequestering of calcium ion; toll-like receptor signaling pathway; virion binding | Endoplasmic reticulum lumen. Melanosome. |
| 266 | 3,31   | 2,985000052 | Q8IWU6 | SULF1_HUMAN | Extracellular sulfatase Sulf-1 OS=Homo sapiens GN=SULF1 PE=1 SV=1                       | 2  | er | Diminishes HSPG (heparan sulfate proteoglycans) sulfation,                                                                                   |                                                                                                                                                                                                                                                                                                                                                                                                                                                                                                                                                                                                                                                                                                                                                                                                                                                                                                                                                              |                                          |
| 80  | 14,77  | 7,588999718 | Q9P2E9 | RRBP1_HUMAN | Ribosome-binding protein 1 OS=Homo sapiens GN=RRBP1 PE=1 SV=4                           | 9  | er | Acts as a ribosome receptor and mediates interaction between the ribosome and the endoplasmic reticulum membrane.                            |                                                                                                                                                                                                                                                                                                                                                                                                                                                                                                                                                                                                                                                                                                                                                                                                                                                                                                                                                              |                                          |
| 240 | 4      | 3,454999998 | P16615 | AT2A2_HUMAN | Sarcoplasmic/endoplasmic reticulum calcium ATPase 2 OS=Homo sapiens GN=ATP2A2 PE=1 SV=1 | 2  | er |                                                                                                                                              |                                                                                                                                                                                                                                                                                                                                                                                                                                                                                                                                                                                                                                                                                                                                                                                                                                                                                                                                                              |                                          |
| 12  | 104,81 | 60,68000197 | P07996 | TSP1_HUMAN  | Thrombospondin-1 OS=Homo sapiens GN=THBS1 PE=1 SV=2                                     | 96 | er | Adhesive glycoprotein that mediates cell-to-cell and cell-to-matrix interaction                                                              |                                                                                                                                                                                                                                                                                                                                                                                                                                                                                                                                                                                                                                                                                                                                                                                                                                                                                                                                                              |                                          |

|     |       |             |        |             |                                                                                    |    |       |                                                                                                                                                                                                  |                                                                                                                                                                                                                                                                                                                                                                                                                                                                                                                                                                  |                                                                          |
|-----|-------|-------------|--------|-------------|------------------------------------------------------------------------------------|----|-------|--------------------------------------------------------------------------------------------------------------------------------------------------------------------------------------------------|------------------------------------------------------------------------------------------------------------------------------------------------------------------------------------------------------------------------------------------------------------------------------------------------------------------------------------------------------------------------------------------------------------------------------------------------------------------------------------------------------------------------------------------------------------------|--------------------------------------------------------------------------|
| 327 | 2,14  | 11,15999967 | Q9Y3B3 | TMED7_HUMAN | Transmembrane emp24 domain-containing protein 7 OS=Homo sapiens GN=TMED7 PE=1 SV=2 | 2  | er    | Potential role in vesicular protein trafficking, mainly in the early secretory pathway.                                                                                                          |                                                                                                                                                                                                                                                                                                                                                                                                                                                                                                                                                                  |                                                                          |
| 192 | 5,35  | 7,874000072 | P07237 | PDIA1_HUMAN | Protein disulfide-isomerase OS=Homo sapiens GN=P4HB PE=1 SV=3                      | 3  | er    |                                                                                                                                                                                                  |                                                                                                                                                                                                                                                                                                                                                                                                                                                                                                                                                                  |                                                                          |
| 170 | 6,32  | 13,7500003  | P08758 | ANXA5_HUMAN | Annexin A5 OS=Homo sapiens GN=ANXA5 PE=1 SV=2                                      | 4  | membr | This protein is an anticoagulant protein that acts as an indirect inhibitor of the thromboplastin-specific complex, which is involved in the blood coagulation cascade                           |                                                                                                                                                                                                                                                                                                                                                                                                                                                                                                                                                                  |                                                                          |
| 123 | 9,24  | 18,28999966 | P21589 | 5NTD_HUMAN  | 5'-nucleotidase OS=Homo sapiens GN=NT5E PE=1 SV=1                                  | 6  | membr | 5'-nucleotidase (5'-NT) (EC 3.1.3.5) (Ecto-5'-nucleotidase) (CD antigen CD73)                                                                                                                    | 5'-nucleotidase activity; AMP catabolic process; DNA metabolic process; adenosine biosynthetic process; anchored component of membrane; dephosphorylation; extracellular vesicular exosome; membrane; metal ion binding; negative regulation of inflammatory response; nucleobase-containing small molecule metabolic process; nucleotide binding; plasma membrane; purine nucleobase metabolic process; purine nucleotide catabolic process; pyrimidine nucleobase metabolic process; pyrimidine nucleoside catabolic process; small molecule metabolic process |                                                                          |
| 46  | 23,52 | 19,13000047 | P15144 | AMPN_HUMAN  | Aminopeptidase N OS=Homo sapiens GN=ANPEP PE=1 SV=4                                | 17 | membr | Aminopeptidase N (AP-N) (hAPN) (EC 3.4.11.2) (Alanyl aminopeptidase) (Aminopeptidase M) (AP-M) (Microsomal aminopeptidase) (Myeloid plasma membrane glycoprotein CD13) (gp150) (CD antigen CD13) | aminopeptidase activity; angiogenesis; angiotensin maturation; cell differentiation; cellular protein metabolic process; cytosol; endoplasmic reticulum-Golgi intermediate compartment; external side of plasma membrane; extracellular vesicular exosome; integral component of plasma membrane; lysosomal membrane; metalloproteinase activity; receptor activity; viral process; virus receptor activity; zinc ion binding                                                                                                                                    | Cell membrane; Single-pass type II membrane protein. Cytoplasmic domain. |

|     |       |             |        |             |                                               |   |       |                                                                                                                                             |                                                                                                                                                                                                                                                                                                                                                                                                                                                                                                                                                                                                                                                                                                                                                                                                                                                                                                                                                                                                                                                                                                                                                                                                                                                                                                                                                                                                                                                                                           |                                                                          |
|-----|-------|-------------|--------|-------------|-----------------------------------------------|---|-------|---------------------------------------------------------------------------------------------------------------------------------------------|-------------------------------------------------------------------------------------------------------------------------------------------------------------------------------------------------------------------------------------------------------------------------------------------------------------------------------------------------------------------------------------------------------------------------------------------------------------------------------------------------------------------------------------------------------------------------------------------------------------------------------------------------------------------------------------------------------------------------------------------------------------------------------------------------------------------------------------------------------------------------------------------------------------------------------------------------------------------------------------------------------------------------------------------------------------------------------------------------------------------------------------------------------------------------------------------------------------------------------------------------------------------------------------------------------------------------------------------------------------------------------------------------------------------------------------------------------------------------------------------|--------------------------------------------------------------------------|
| 93  | 13,22 | 29,76999879 | P04083 | ANXA1_HUMAN | Annexin A1 OS=Homo sapiens GN=ANXA1 PE=1 SV=2 | 8 | membr | Annexin A1 (Annexin I) (Annexin-1) (Calpactin II) (Calpactin-2) (Chromobindin-9) (Lipocortin I) (Phospholipase A2 inhibitory protein) (p35) | alpha-beta T cell differentiation; arachidonic acid secretion; basolateral plasma membrane; calcium ion binding; calcium-dependent phospholipid binding; cell surface receptor signaling pathway; cellular component movement; cellular response to glucocorticoid stimulus; cellular response to hydrogen peroxide; cilium; cornified envelope; cytoplasm; endocrine pancreas development; estrous cycle phase; extracellular region; extracellular space; extracellular vesicular exosome; gliogenesis; hepatocyte differentiation; inflammatory response; insulin secretion; keratinocyte differentiation; mitochondrial membrane; negative regulation of acute inflammatory response; negative regulation of apoptotic process; negative regulation of catalytic activity; negative regulation of protein secretion; neutrophil clearance; neutrophil homeostasis; nucleus; peptide cross-linking; phospholipase A2 inhibitor activity; phospholipid binding; positive regulation of G1/S transition of mitotic cell cycle; positive regulation of neutrophil apoptotic process; positive regulation of prostaglandin biosynthetic process; positive regulation of vesicle fusion; protein binding; protein binding, bridging; protein complex; receptor binding; regulation of cell proliferation; response to X-ray; response to drug; response to estradiol; response to interleukin-1; response to peptide hormone; sarcolemma; signal transduction; structural molecule activity | Nucleus. Cytoplasm. Cell projection & cilium. Basolateral cell membrane. |
| 259 | 3,57  | 17,41999984 | Q03135 | CAV1_HUMAN  | Caveolin-1 OS=Homo sapiens GN=CAV1 PE=1 SV=4  | 2 | membr | Caveolin-1                                                                                                                                  | Golgi membrane; MAPK cascade; T cell costimulation; acrosomal membrane; angiogenesis; apical plasma membrane; apoptotic signaling                                                                                                                                                                                                                                                                                                                                                                                                                                                                                                                                                                                                                                                                                                                                                                                                                                                                                                                                                                                                                                                                                                                                                                                                                                                                                                                                                         |                                                                          |



|  |  |  |  |  |  |  |  |  |                                                                                                                                                                                                                                                                                                                                                                                                                                                                                                                                                                                                                                                                                                                                                                                                                                                                                                                                                                                                                                                                                                                                                                                                                                                                                                                                                                                                                                                                                                                                                                                                                  |  |
|--|--|--|--|--|--|--|--|--|------------------------------------------------------------------------------------------------------------------------------------------------------------------------------------------------------------------------------------------------------------------------------------------------------------------------------------------------------------------------------------------------------------------------------------------------------------------------------------------------------------------------------------------------------------------------------------------------------------------------------------------------------------------------------------------------------------------------------------------------------------------------------------------------------------------------------------------------------------------------------------------------------------------------------------------------------------------------------------------------------------------------------------------------------------------------------------------------------------------------------------------------------------------------------------------------------------------------------------------------------------------------------------------------------------------------------------------------------------------------------------------------------------------------------------------------------------------------------------------------------------------------------------------------------------------------------------------------------------------|--|
|  |  |  |  |  |  |  |  |  | <p> pathway; basolateral plasma membrane; blood coagulation; calcium ion homeostasis; calcium ion transport; caveola; caveola assembly; caveolin-mediated endocytosis; cell cortex; cellular calcium ion homeostasis; cellular response to hyperoxia; cellular response to starvation; cholesterol binding; cholesterol homeostasis; cholesterol transport; cilium; cytoplasmic vesicle; cytosolic calcium ion homeostasis; endocytic vesicle membrane; endoplasmic reticulum; endosome; enzyme binding; inactivation of MAPK activity; integral component of plasma membrane; intracellular; lactation; leukocyte migration; lipid particle; lipid storage; maintenance of protein location in cell; mammary gland development; mammary gland involution; membrane depolarization; membrane raft; negative regulation of BMP signaling pathway; negative regulation of JAK-STAT cascade; negative regulation of MAPK cascade; negative regulation of anoikis; negative regulation of canonical Wnt signaling pathway; negative regulation of cytokine-mediated signaling pathway; negative regulation of endothelial cell proliferation; negative regulation of epithelial cell differentiation; negative regulation of nitric oxide biosynthetic process; negative regulation of nitric-oxide synthase activity; negative regulation of peptidyl-serine phosphorylation; negative regulation of pinocytosis; negative regulation of protein binding; negative regulation of protein ubiquitination; negative regulation of transcription from RNA polymerase II promoter; negative regulation of tyrosine </p> |  |
|--|--|--|--|--|--|--|--|--|------------------------------------------------------------------------------------------------------------------------------------------------------------------------------------------------------------------------------------------------------------------------------------------------------------------------------------------------------------------------------------------------------------------------------------------------------------------------------------------------------------------------------------------------------------------------------------------------------------------------------------------------------------------------------------------------------------------------------------------------------------------------------------------------------------------------------------------------------------------------------------------------------------------------------------------------------------------------------------------------------------------------------------------------------------------------------------------------------------------------------------------------------------------------------------------------------------------------------------------------------------------------------------------------------------------------------------------------------------------------------------------------------------------------------------------------------------------------------------------------------------------------------------------------------------------------------------------------------------------|--|

|  |  |  |  |  |  |  |  |  |                                                                                                                                                                                                                                                                                                                                                                                                                                                                                                                                                                                                                                                                                                                                                                                                                                                                                                                                                                                                                                                                                                                                                                                                                                                                                                                                                                                                                                               |  |
|--|--|--|--|--|--|--|--|--|-----------------------------------------------------------------------------------------------------------------------------------------------------------------------------------------------------------------------------------------------------------------------------------------------------------------------------------------------------------------------------------------------------------------------------------------------------------------------------------------------------------------------------------------------------------------------------------------------------------------------------------------------------------------------------------------------------------------------------------------------------------------------------------------------------------------------------------------------------------------------------------------------------------------------------------------------------------------------------------------------------------------------------------------------------------------------------------------------------------------------------------------------------------------------------------------------------------------------------------------------------------------------------------------------------------------------------------------------------------------------------------------------------------------------------------------------|--|
|  |  |  |  |  |  |  |  |  | <p>phosphorylation of Stat5 protein; nitric oxide homeostasis; nitric oxide metabolic process; nitric-oxide synthase binding; patched binding; peptidase activator activity; perinuclear region of cytoplasm; plasma membrane; positive regulation of calcium ion transport into cytosol; positive regulation of canonical Wnt signaling pathway; positive regulation of extrinsic apoptotic signaling pathway; positive regulation of intrinsic apoptotic signaling pathway; positive regulation of metalloenzyme activity; positive regulation of peptidyl-serine phosphorylation; positive regulation of vasoconstriction; protein binding; protein complex; protein complex scaffold; protein homooligomerization; protein localization; receptor binding; receptor internalization involved in canonical Wnt signaling pathway; regulation of blood coagulation; regulation of fatty acid metabolic process; regulation of nitric-oxide synthase activity; regulation of peptidase activity; regulation of smooth muscle contraction; regulation of the force of heart contraction by chemical signal; response to calcium ion; response to estrogen; response to hypoxia; response to ischemia; response to progesterone; skeletal muscle tissue development; small molecule metabolic process; structural molecule activity; triglyceride metabolic process; vasculogenesis; vasoconstriction; vesicle organization; viral process</p> |  |
|--|--|--|--|--|--|--|--|--|-----------------------------------------------------------------------------------------------------------------------------------------------------------------------------------------------------------------------------------------------------------------------------------------------------------------------------------------------------------------------------------------------------------------------------------------------------------------------------------------------------------------------------------------------------------------------------------------------------------------------------------------------------------------------------------------------------------------------------------------------------------------------------------------------------------------------------------------------------------------------------------------------------------------------------------------------------------------------------------------------------------------------------------------------------------------------------------------------------------------------------------------------------------------------------------------------------------------------------------------------------------------------------------------------------------------------------------------------------------------------------------------------------------------------------------------------|--|

|     |       |              |        |             |                                                     |   |       |                                                                                                                                                                                         |                                                                                                                                                                                                                                                                                      |                                                |
|-----|-------|--------------|--------|-------------|-----------------------------------------------------|---|-------|-----------------------------------------------------------------------------------------------------------------------------------------------------------------------------------------|--------------------------------------------------------------------------------------------------------------------------------------------------------------------------------------------------------------------------------------------------------------------------------------|------------------------------------------------|
| 104 | 10,59 | 6,436000019  | Q6YHK3 | CD109_HUMAN | CD109 antigen OS=Homo sapiens GN=CD109 PE=1 SV=2    | 6 | membr | CD109 antigen (150 kDa TGF-beta-1-binding protein) (C3 and PZP-like alpha-2-macroglobulin domain-containing protein 7) (Platelet-specific Gov antigen) (p180) (r150) (CD antigen CD109) | anchored component of membrane; extracellular space; negative regulation of transforming growth factor beta receptor signaling pathway; negative regulation of wound healing; plasma membrane; serine-type endopeptidase inhibitor activity; transforming growth factor beta binding | Cell membrane; Lipid-anchor &circ; GPI-anchor. |
| 166 | 6,26  | 6,334000081  | P16070 | CD44_HUMAN  | CD44 antigen OS=Homo sapiens GN=CD44 PE=1 SV=3      | 5 | membr | CD44 antigen                                                                                                                                                                            | cell adhesion; hyaluronic acid binding; membrane                                                                                                                                                                                                                                     |                                                |
| 204 | 4,96  | 29,690000041 | P13987 | CD59_HUMAN  | CD59 glycoprotein OS=Homo sapiens GN=CD59 PE=1 SV=1 | 4 | membr | CD59 glycoprotein                                                                                                                                                                       |                                                                                                                                                                                                                                                                                      |                                                |
| 248 | 4     | 18,21999997  | P60033 | CD81_HUMAN  | CD81 antigen OS=Homo sapiens GN=CD81 PE=1 SV=1      | 3 | membr | CD81 antigen (Fragment)                                                                                                                                                                 | integral component of membrane                                                                                                                                                                                                                                                       |                                                |

|     |      |             |        |             |                                                                                   |   |       |                                                                     |                                                                                                                                                                                                                                                                                                                                                                                                                                                                                                                                                                                                                                                                                                                                                                                                                                                                                                                                                                                                                                                                                                                                                                                                                                                                                                                                                                                                                                                                                                                                                                                                                  |                                                                                                                                                                    |
|-----|------|-------------|--------|-------------|-----------------------------------------------------------------------------------|---|-------|---------------------------------------------------------------------|------------------------------------------------------------------------------------------------------------------------------------------------------------------------------------------------------------------------------------------------------------------------------------------------------------------------------------------------------------------------------------------------------------------------------------------------------------------------------------------------------------------------------------------------------------------------------------------------------------------------------------------------------------------------------------------------------------------------------------------------------------------------------------------------------------------------------------------------------------------------------------------------------------------------------------------------------------------------------------------------------------------------------------------------------------------------------------------------------------------------------------------------------------------------------------------------------------------------------------------------------------------------------------------------------------------------------------------------------------------------------------------------------------------------------------------------------------------------------------------------------------------------------------------------------------------------------------------------------------------|--------------------------------------------------------------------------------------------------------------------------------------------------------------------|
| 200 | 7,14 | 22,50999957 | P60953 | CDC42_HUMAN | Cell division control protein 42 homolog<br>OS=Homo sapiens<br>GN=CDC42 PE=1 SV=2 | 4 | membr | Cell division control protein 42 homolog (G25K GTP-binding protein) | Fc-gamma receptor signaling pathway involved in phagocytosis; GTP binding; GTP catabolic process; GTPase activity; Golgi membrane; Golgi organization; T cell costimulation; actin cytoskeleton organization; actin filament branching; actin filament bundle assembly; adherens junction organization; apical part of cell; apolipoprotein A-I receptor binding; axon guidance; blood coagulation; canonical Wnt signaling pathway; cardiac conduction system development; cellular protein localization; cytoplasm; cytosol; epidermal growth factor receptor signaling pathway; epithelial cell-cell adhesion; epithelial-mesenchymal cell signaling; establishment of Golgi localization; establishment or maintenance of apical/basal cell polarity; establishment or maintenance of cell polarity; extracellular vesicular exosome; filopodium; filopodium assembly; hair follicle morphogenesis; hair follicle placode formation; heart contraction; identical protein binding; innate immune response; keratinization; keratinocyte development; macrophage differentiation; membrane; microtubule organizing center; midbody; mitotic spindle; multicellular organism growth; muscle cell differentiation; negative regulation of epidermal growth factor receptor signaling pathway; negative regulation of gene expression; negative regulation of protein complex assembly; neuron fate determination; neuron projection; neuronal cell body; nuclear migration; organelle transport along microtubule; plasma membrane; positive regulation of DNA replication; positive regulation of JNK cascade; | Cell membrane; Lipid-anchor; Cytoplasmic side. Cytoplasm ↔ cytoskeleton ↔ microtubule organizing center ↔ centrosome. Cytoplasm ↔ cytoskeleton ↔ spindle. Midbody. |
|-----|------|-------------|--------|-------------|-----------------------------------------------------------------------------------|---|-------|---------------------------------------------------------------------|------------------------------------------------------------------------------------------------------------------------------------------------------------------------------------------------------------------------------------------------------------------------------------------------------------------------------------------------------------------------------------------------------------------------------------------------------------------------------------------------------------------------------------------------------------------------------------------------------------------------------------------------------------------------------------------------------------------------------------------------------------------------------------------------------------------------------------------------------------------------------------------------------------------------------------------------------------------------------------------------------------------------------------------------------------------------------------------------------------------------------------------------------------------------------------------------------------------------------------------------------------------------------------------------------------------------------------------------------------------------------------------------------------------------------------------------------------------------------------------------------------------------------------------------------------------------------------------------------------------|--------------------------------------------------------------------------------------------------------------------------------------------------------------------|

|     |     |             |        |            |                                                    |   |       |                                                                                                                       |                                                                                                                                                                                                                                                                                                                                                                                                                                                                                                                                                                                                                                                                                                                                                                                                                                                                                                                                                                                                                                                                                                                                                                                                                                                    |  |
|-----|-----|-------------|--------|------------|----------------------------------------------------|---|-------|-----------------------------------------------------------------------------------------------------------------------|----------------------------------------------------------------------------------------------------------------------------------------------------------------------------------------------------------------------------------------------------------------------------------------------------------------------------------------------------------------------------------------------------------------------------------------------------------------------------------------------------------------------------------------------------------------------------------------------------------------------------------------------------------------------------------------------------------------------------------------------------------------------------------------------------------------------------------------------------------------------------------------------------------------------------------------------------------------------------------------------------------------------------------------------------------------------------------------------------------------------------------------------------------------------------------------------------------------------------------------------------|--|
|     |     |             |        |            |                                                    |   |       |                                                                                                                       | positive regulation of cytokinesis; positive regulation of gene expression; positive regulation of hair follicle cell proliferation; positive regulation of intracellular protein transport; positive regulation of metalloenzyme activity; positive regulation of muscle cell differentiation; positive regulation of neuron apoptotic process; positive regulation of peptidyl-serine phosphorylation; positive regulation of phosphatidylinositol 3-kinase activity; positive regulation of pseudopodium assembly; positive regulation of substrate adhesion-dependent cell spreading; positive regulation of synapse structural plasticity; protein binding; protein kinase binding; regulation of attachment of spindle microtubules to kinetochore; regulation of filopodium assembly; regulation of mitosis; regulation of protein catabolic process; regulation of protein heterodimerization activity; regulation of protein kinase activity; regulation of protein stability; regulation of small GTPase mediated signal transduction; secretory granule; small GTPase mediated signal transduction; spindle midzone; sprouting angiogenesis; submandibular salivary gland formation; substantia nigra development; thioesterase binding |  |
| 118 | 9,5 | 9,649000317 | P05556 | ITB1_HUMAN | Integrin beta-1 OS=Homo sapiens GN=ITGB1 PE=1 SV=2 | 5 | membr | Integrin beta-1 (Fibronectin receptor subunit beta) (Glycoprotein IIa) (GPIIA) (VLA-4 subunit beta) (CD antigen CD29) |                                                                                                                                                                                                                                                                                                                                                                                                                                                                                                                                                                                                                                                                                                                                                                                                                                                                                                                                                                                                                                                                                                                                                                                                                                                    |  |

|     |       |             |        |             |                                                                         |   |       |                                                                                                                                                                                                                           |                                                                                                                                                                                                                                                                                                                                                                                                                                                                                                                                                                                                                                                                  |                                                                                                                                                                                                                                           |
|-----|-------|-------------|--------|-------------|-------------------------------------------------------------------------|---|-------|---------------------------------------------------------------------------------------------------------------------------------------------------------------------------------------------------------------------------|------------------------------------------------------------------------------------------------------------------------------------------------------------------------------------------------------------------------------------------------------------------------------------------------------------------------------------------------------------------------------------------------------------------------------------------------------------------------------------------------------------------------------------------------------------------------------------------------------------------------------------------------------------------|-------------------------------------------------------------------------------------------------------------------------------------------------------------------------------------------------------------------------------------------|
| 227 | 4,13  | 8,145999908 | P26038 | MOES_HUMAN  | Moesin OS=Homo sapiens<br>GN=MSN PE=1 SV=3                              | 2 | membr | Moesin (Membrane-organizing extension spike protein)                                                                                                                                                                      | apical part of cell; apical plasma membrane; basolateral plasma membrane; blood microparticle; cell adhesion molecule binding; cellular component movement; cytoplasm; cytoskeleton; double-stranded RNA binding; establishment of endothelial barrier; extracellular vesicular exosome; extrinsic component of membrane; filopodium; leukocyte cell-cell adhesion; leukocyte migration; membrane to membrane docking; microvillus; microvillus membrane; plasma membrane; positive regulation of gene expression; protein binding; protein kinase binding; receptor binding; regulation of lymphocyte migration; structural constituent of cytoskeleton; uropod | Cell membrane; Peripheral membrane protein; Cytoplasmic side. Cytoplasmic side. Apical cell membrane; Peripheral membrane protein; Cytoplasmic side. Cell projection microvillus membrane; Peripheral membrane protein; Cytoplasmic side. |
| 218 | 4,39  | 2,037999965 | Q9NZM1 | MYOF_HUMAN  | Myoferlin OS=Homo sapiens GN=MYOF PE=1 SV=1                             | 2 | membr | Calcium/phospholipid-binding protein that plays a role in the plasmalemma repair mechanism of endothelial cells that permits rapid resealing of membranes disrupted by mechanical stress. Involved in endocytic recycling |                                                                                                                                                                                                                                                                                                                                                                                                                                                                                                                                                                                                                                                                  |                                                                                                                                                                                                                                           |
| 101 | 11,25 | 10,27000025 | P08473 | NEP_HUMAN   | Neprilysin OS=Homo sapiens GN=MME PE=1 SV=2                             | 7 | membr |                                                                                                                                                                                                                           |                                                                                                                                                                                                                                                                                                                                                                                                                                                                                                                                                                                                                                                                  |                                                                                                                                                                                                                                           |
| 420 | 1,72  | 0,709199999 | Q6ZW05 | PTHD4_HUMAN | Patched domain-containing protein 4 OS=Homo sapiens GN=PTCHD4 PE=2 SV=3 | 2 | membr |                                                                                                                                                                                                                           |                                                                                                                                                                                                                                                                                                                                                                                                                                                                                                                                                                                                                                                                  |                                                                                                                                                                                                                                           |

|     |      |             |        |             |                                                                               |   |       |                                                                                                                                                                                                                                                                                                                                                                                                                                                                                                                                                                                                                                                                                                                                                                                                                                                                                                                                                                                                       |  |  |
|-----|------|-------------|--------|-------------|-------------------------------------------------------------------------------|---|-------|-------------------------------------------------------------------------------------------------------------------------------------------------------------------------------------------------------------------------------------------------------------------------------------------------------------------------------------------------------------------------------------------------------------------------------------------------------------------------------------------------------------------------------------------------------------------------------------------------------------------------------------------------------------------------------------------------------------------------------------------------------------------------------------------------------------------------------------------------------------------------------------------------------------------------------------------------------------------------------------------------------|--|--|
| 136 | 8,13 | 4,707000032 | P46940 | IQGA1_HUMAN | Ras GTPase-activating-like protein IQGAP1 OS=Homo sapiens GN=IQGAP1 PE=1 SV=1 | 4 | membr | GTPase activator activity; GTPase inhibitor activity; Ras GTPase activator activity; actin filament; calcium ion binding; calmodulin binding; cell leading edge; cellular response to calcium ion; cytoplasm; energy reserve metabolic process; extracellular vesicular exosome; extrinsic component of cytoplasmic side of plasma membrane; glomerular visceral epithelial cell development; lateral plasma membrane; microtubule; midbody; negative regulation of catalytic activity; negative regulation of dephosphorylation; neuron projection; phosphatidylinositol-3,4,5-trisphosphate binding; plasma membrane; positive regulation of GTPase activity; positive regulation of protein kinase activity; protein binding; protein kinase binding; protein phosphatase binding; regulation of cytokine production; regulation of insulin secretion; ribonucleoprotein complex; signal transduction; slit diaphragm; small GTPase mediated signal transduction; small molecule metabolic process |  |  |
|-----|------|-------------|--------|-------------|-------------------------------------------------------------------------------|---|-------|-------------------------------------------------------------------------------------------------------------------------------------------------------------------------------------------------------------------------------------------------------------------------------------------------------------------------------------------------------------------------------------------------------------------------------------------------------------------------------------------------------------------------------------------------------------------------------------------------------------------------------------------------------------------------------------------------------------------------------------------------------------------------------------------------------------------------------------------------------------------------------------------------------------------------------------------------------------------------------------------------------|--|--|

|     |     |             |        |            |                                                                              |   |       |                                                                                                                                                                                                                                                                                                                                                                                                                                                                                                                                                                                                                                                                                                                                                                                                                                                                                                                                                                                                                                                                                                                                                                                               |  |  |
|-----|-----|-------------|--------|------------|------------------------------------------------------------------------------|---|-------|-----------------------------------------------------------------------------------------------------------------------------------------------------------------------------------------------------------------------------------------------------------------------------------------------------------------------------------------------------------------------------------------------------------------------------------------------------------------------------------------------------------------------------------------------------------------------------------------------------------------------------------------------------------------------------------------------------------------------------------------------------------------------------------------------------------------------------------------------------------------------------------------------------------------------------------------------------------------------------------------------------------------------------------------------------------------------------------------------------------------------------------------------------------------------------------------------|--|--|
| 127 | 8,9 | 34,90000069 | P63000 | RAC1_HUMAN | Ras-related C3 botulinum toxin substrate 1 OS=Homo sapiens GN=RAC1 PE=1 SV=1 | 6 | membr | <p>Fc-epsilon receptor signaling pathway; Fc-gamma receptor signaling pathway involved in phagocytosis; GTP binding; GTPase activity; Golgi membrane; Rho GDP-dissociation inhibitor binding; T cell costimulation; Wnt signaling pathway, planar cell polarity pathway; actin cytoskeleton organization; actin filament polymerization; anatomical structure arrangement; anatomical structure morphogenesis; apoptotic signaling pathway; auditory receptor cell morphogenesis; axon guidance; blood coagulation; bone resorption; cell adhesion; cell motility; cell proliferation; cell-cell junction organization; cell-matrix adhesion; cellular component movement; cerebral cortex radially oriented cell migration; cochlea morphogenesis; cytosol; dendrite morphogenesis; dopaminergic neuron differentiation; embryonic olfactory bulb interneuron precursor migration; engulfment of apoptotic cell; enzyme binding; epithelial cell morphogenesis; extracellular vesicular exosome; extrinsic component of plasma membrane; hyperosmotic response; inflammatory response; innate immune response; intracellular signal transduction; lamellipodium; lamellipodium assembly;</p> |  |  |
|-----|-----|-------------|--------|------------|------------------------------------------------------------------------------|---|-------|-----------------------------------------------------------------------------------------------------------------------------------------------------------------------------------------------------------------------------------------------------------------------------------------------------------------------------------------------------------------------------------------------------------------------------------------------------------------------------------------------------------------------------------------------------------------------------------------------------------------------------------------------------------------------------------------------------------------------------------------------------------------------------------------------------------------------------------------------------------------------------------------------------------------------------------------------------------------------------------------------------------------------------------------------------------------------------------------------------------------------------------------------------------------------------------------------|--|--|



|  |  |  |  |  |  |  |  |                                                                                                                                                                                                                                                                                                                                                                                                                                                                                                                                                                                                                                                                                                                                                                                                                                                                                                                                                                                                                                                                                                                                                                                                                                                                                                                                                                |  |  |
|--|--|--|--|--|--|--|--|----------------------------------------------------------------------------------------------------------------------------------------------------------------------------------------------------------------------------------------------------------------------------------------------------------------------------------------------------------------------------------------------------------------------------------------------------------------------------------------------------------------------------------------------------------------------------------------------------------------------------------------------------------------------------------------------------------------------------------------------------------------------------------------------------------------------------------------------------------------------------------------------------------------------------------------------------------------------------------------------------------------------------------------------------------------------------------------------------------------------------------------------------------------------------------------------------------------------------------------------------------------------------------------------------------------------------------------------------------------|--|--|
|  |  |  |  |  |  |  |  | <p> localization within<br/> membrane; mast cell<br/> chemotaxis; melanosome;<br/> membrane; negative<br/> regulation of interleukin-23<br/> production; negative<br/> regulation of receptor-<br/> mediated endocytosis;<br/> neurotrophin TRK receptor<br/> signaling pathway;<br/> phagocytic cup; plasma<br/> membrane; platelet<br/> activation; positive<br/> regulation of DNA<br/> replication; positive<br/> regulation of Rho protein<br/> signal transduction;<br/> positive regulation of actin<br/> filament polymerization;<br/> positive regulation of<br/> apoptotic process; positive<br/> regulation of<br/> lamellipodium assembly;<br/> positive regulation of<br/> phosphatidylinositol 3-<br/> kinase activity; positive<br/> regulation of protein<br/> phosphorylation; protein<br/> binding; regulation of cell<br/> migration; regulation of<br/> defense response to virus<br/> by virus; regulation of<br/> hydrogen peroxide<br/> metabolic process;<br/> regulation of respiratory<br/> burst; response to<br/> wounding; ruffle assembly;<br/> ruffle membrane; ruffle<br/> organization; semaphorin-<br/> plexin signaling pathway;<br/> small GTPase mediated<br/> signal transduction;<br/> substrate adhesion-<br/> dependent cell spreading;<br/> thioesterase binding; trans-<br/> Golgi network; viral<br/> process </p> |  |  |
|--|--|--|--|--|--|--|--|----------------------------------------------------------------------------------------------------------------------------------------------------------------------------------------------------------------------------------------------------------------------------------------------------------------------------------------------------------------------------------------------------------------------------------------------------------------------------------------------------------------------------------------------------------------------------------------------------------------------------------------------------------------------------------------------------------------------------------------------------------------------------------------------------------------------------------------------------------------------------------------------------------------------------------------------------------------------------------------------------------------------------------------------------------------------------------------------------------------------------------------------------------------------------------------------------------------------------------------------------------------------------------------------------------------------------------------------------------------|--|--|

|     |       |             |        |             |                                                                     |    |       |                                                                                                                                                                                                                                                                                                                                                                                                                                                                                                                                                                                                                                                                                                                                                                                                                                                                |  |  |
|-----|-------|-------------|--------|-------------|---------------------------------------------------------------------|----|-------|----------------------------------------------------------------------------------------------------------------------------------------------------------------------------------------------------------------------------------------------------------------------------------------------------------------------------------------------------------------------------------------------------------------------------------------------------------------------------------------------------------------------------------------------------------------------------------------------------------------------------------------------------------------------------------------------------------------------------------------------------------------------------------------------------------------------------------------------------------------|--|--|
| 554 | 1,41  | 11,63000017 | P61106 | RAB14_HUMAN | Ras-related protein Rab-14<br>OS=Homo sapiens<br>GN=RAB14 PE=1 SV=4 | 2  | membr | GDP binding; GTP binding; GTP catabolic process; GTPase activity; Golgi membrane; Golgi stack; Golgi to endosome transport; cytoplasmic vesicle membrane; cytosol; early endosome; early endosome membrane; embryo development; endocytic recycling; extracellular vesicular exosome; fibroblast growth factor receptor signaling pathway; intracellular; intracellular transport; late endosome; lysosomal membrane; lysosome; membrane organization; nuclear outer membrane-endoplasmic reticulum membrane network; perinuclear region of cytoplasm; phagocytic vesicle; phagocytic vesicle membrane; plasma membrane; protein binding; protein transport; recycling endosome; regulation of protein localization; rough endoplasmic reticulum; small GTPase mediated signal transduction; trans-Golgi network transport vesicle; vesicle-mediated transport |  |  |
| 139 | 8,08  | 22,98000008 | P04216 | THY1_HUMAN  | Thy-1 membrane glycoprotein OS=Homo sapiens GN=THY1 PE=1 SV=2       | 5  | membr | Thy-1 membrane glycoprotein (Fragment)                                                                                                                                                                                                                                                                                                                                                                                                                                                                                                                                                                                                                                                                                                                                                                                                                         |  |  |
| 161 | 6,67  | 7,113999873 | P14923 | PLAK_HUMAN  | Junction plakoglobin OS=Homo sapiens GN=JUP PE=1 SV=3               | 3  | membr | Common junctional plaque protein                                                                                                                                                                                                                                                                                                                                                                                                                                                                                                                                                                                                                                                                                                                                                                                                                               |  |  |
| 84  | 14,55 | 27,28999853 | Q92743 | HTRA1_HUMAN | Serine protease HTRA1 OS=Homo sapiens GN=HTRA1 PE=1 SV=1            | 10 | membr | Serine protease with a variety of targets, including extracellular matrix proteins such as fibronectin                                                                                                                                                                                                                                                                                                                                                                                                                                                                                                                                                                                                                                                                                                                                                         |  |  |

|     |       |             |        |             |                                                                                 |    |       |                                                                                                                                                         |  |  |
|-----|-------|-------------|--------|-------------|---------------------------------------------------------------------------------|----|-------|---------------------------------------------------------------------------------------------------------------------------------------------------------|--|--|
| 148 | 10,12 | 19,75000054 | P09525 | ANXA4_HUMAN | Annexin A4 OS=Homo sapiens GN=ANXA4 PE=1 SV=4                                   | 5  | membr | promotes membrane fusion and is involved in exocytosis.                                                                                                 |  |  |
| 484 | 0,88  | 1,685000025 | Q8WWZ4 | ABCAA_HUMAN | ATP-binding cassette sub-family A member 10 OS=Homo sapiens GN=ABCA10 PE=2 SV=3 | 2  | membr | Probable transporter which may play a role in macrophage lipid homeostasis                                                                              |  |  |
| 141 | 8,06  | 44,04999912 | P80723 | BASP1_HUMAN | Brain acid soluble protein 1 OS=Homo sapiens GN=BASP1 PE=1 SV=2                 | 6  | membr |                                                                                                                                                         |  |  |
| 158 | 6,89  | 4,473999888 | Q08554 | DSC1_HUMAN  | Desmocollin-1 OS=Homo sapiens GN=DSC1 PE=1 SV=2                                 | 4  | membr | Component of intercellular desmosome junctions. Involved in the interaction of plaque proteins and intermediate filaments mediating cell-cell adhesion. |  |  |
| 87  | 14,09 | 10,96000001 | Q02413 | DSG1_HUMAN  | Desmoglein-1 OS=Homo sapiens GN=DSG1 PE=1 SV=2                                  | 9  | membr | Component of intercellular desmosome junctions. Involved in the interaction of plaque proteins and intermediate filaments mediating cell-cell adhesion. |  |  |
| 79  | 14,85 | 3,203999996 | P15924 | DESP_HUMAN  | Desmoplakin OS=Homo sapiens GN=DSP PE=1 SV=3                                    | 7  | membr | Major high molecular weight protein of desmosomes                                                                                                       |  |  |
| 153 | 7,12  | 19,51999962 | Q9NZN4 | EHD2_HUMAN  | EH domain-containing protein 2 OS=Homo sapiens GN=EHD2 PE=1 SV=2                | 5  | membr | ATP- and membrane-binding protein that controls membrane reorganization/tubulation upon ATP hydrolysis                                                  |  |  |
| 175 | 6,09  | 3,908000141 | P08648 | ITA5_HUMAN  | Integrin alpha-5 OS=Homo sapiens GN=ITGA5 PE=1 SV=2                             | 3  | membr |                                                                                                                                                         |  |  |
| 52  | 21,37 | 40,04999995 | Q08431 | MFGM_HUMAN  | Lactadherin OS=Homo sapiens GN=MFGE8 PE=1 SV=2                                  | 13 | membr | cell adhesion                                                                                                                                           |  |  |

|     |       |             |        |             |                                                                              |    |       |                                                                                                                                                                                                                                                                                                                                                                                   |  |  |
|-----|-------|-------------|--------|-------------|------------------------------------------------------------------------------|----|-------|-----------------------------------------------------------------------------------------------------------------------------------------------------------------------------------------------------------------------------------------------------------------------------------------------------------------------------------------------------------------------------------|--|--|
| 86  | 14,33 | 36,66999936 | Q6NZI2 | PTRF_HUMAN  | Polymerase I and transcript release factor OS=Homo sapiens GN=PTRF PE=1 SV=1 | 10 | membr | caveola; cytoplasm; cytosol; endoplasmic reticulum; gene expression; mitochondrion; nucleoplasm; nucleus; poly(A) RNA binding; protein binding; rRNA primary transcript binding; regulation of transcription, DNA-templated; termination of RNA polymerase I transcription; transcription from RNA polymerase I promoter; transcription initiation from RNA polymerase I promoter |  |  |
| 420 | 1,72  | 0,643800013 | Q9Y5G6 | PCDG7_HUMAN | Protocadherin gamma-A7 OS=Homo sapiens GN=PCDHGA7 PE=2 SV=1                  | 2  | membr |                                                                                                                                                                                                                                                                                                                                                                                   |  |  |
| 193 | 5,35  | 17,92999953 | P61224 | RAP1B_HUMAN | Ras-related protein Rap-1b OS=Homo sapiens GN=RAP1B PE=1 SV=1                | 4  | membr | GTP binding; GTP catabolic process; membrane; small GTPase mediated signal transduction                                                                                                                                                                                                                                                                                           |  |  |
| 193 | 3,21  | 11,9599998  | A6NIZ1 | RP1BL_HUMAN | Ras-related protein Rap-1b-like protein OS=Homo sapiens PE=2 SV=1            | 3  | membr |                                                                                                                                                                                                                                                                                                                                                                                   |  |  |
| 576 | 7,14  | 26,94000006 | P08134 | RHOC_HUMAN  | Rho-related GTP-binding protein RhoC OS=Homo sapiens GN=RHOC PE=1 SV=1       | 6  | membr | GTP binding; apical junction assembly; cytosol; nucleus; plasma membrane; small GTPase mediated signal transduction                                                                                                                                                                                                                                                               |  |  |
| 206 | 4,86  | 13,30000013 | Q15019 | SEPT2_HUMAN | Septin-2 OS=Homo sapiens GN=SEPT2 PE=1 SV=1                                  | 3  | membr | GTP binding; cell cycle; cell surface; ciliary membrane; cilium assembly; enzyme regulator activity; exocyst; neuron projection development; perinuclear region of cytoplasm; regulation of L-glutamate transport; regulation of protein localization; septin complex; smoothened signaling pathway; synapse                                                                      |  |  |

|     |      |             |        |            |                                                                             |   |       |                                                                                                                                                                                                    |                                                                                                                                                                                                                                                                                                                                                                                                                                                                                                                                                                                                                                                                                                                                                                                                                                                                                                                                                                                                                                                                                                                                                                                                                                                                                                                                                                                                                                                                   |  |
|-----|------|-------------|--------|------------|-----------------------------------------------------------------------------|---|-------|----------------------------------------------------------------------------------------------------------------------------------------------------------------------------------------------------|-------------------------------------------------------------------------------------------------------------------------------------------------------------------------------------------------------------------------------------------------------------------------------------------------------------------------------------------------------------------------------------------------------------------------------------------------------------------------------------------------------------------------------------------------------------------------------------------------------------------------------------------------------------------------------------------------------------------------------------------------------------------------------------------------------------------------------------------------------------------------------------------------------------------------------------------------------------------------------------------------------------------------------------------------------------------------------------------------------------------------------------------------------------------------------------------------------------------------------------------------------------------------------------------------------------------------------------------------------------------------------------------------------------------------------------------------------------------|--|
| 130 | 8,65 | 32,12000132 | P61586 | RHOA_HUMAN | Transforming protein RhoA<br>OS=Homo sapiens<br>GN=RHOA PE=1 SV=1           | 7 | membr | Regulates a signal transduction pathway linking plasma membrane receptors to the assembly of focal adhesions and actin stress fibers.                                                              |                                                                                                                                                                                                                                                                                                                                                                                                                                                                                                                                                                                                                                                                                                                                                                                                                                                                                                                                                                                                                                                                                                                                                                                                                                                                                                                                                                                                                                                                   |  |
| 177 | 6,05 | 9,424000233 | P10809 | CH60_HUMAN | 60 kDa heat shock protein, mitochondrial OS=Homo sapiens GN=HSPD1 PE=1 SV=2 | 3 | mito  | 60 kDa heat shock protein, mitochondrial (60 kDa chaperonin) (Chaperonin 60) (CPN60) (Heat shock protein 60) (HSP-60) (Hsp60) (HuCHA60) (Mitochondrial matrix protein P1) (P60 lymphocyte protein) | 'de novo' protein folding; ATP binding; ATP catabolic process; ATPase activity; B cell activation; B cell cytokine production; B cell proliferation; DNA replication origin binding; MyD88-dependent toll-like receptor signaling pathway; T cell activation; activation of cysteine-type endopeptidase activity involved in apoptotic process; cell surface; chaperone binding; chaperone-mediated protein complex assembly; coated pit; coated vesicle; cytoplasm; cytosol; double-stranded RNA binding; early endosome; extracellular space; extracellular vesicular exosome; isotype switching to IgG isotypes; lipopolysaccharide binding; lipopolysaccharide receptor complex; mitochondrial inner membrane; mitochondrial matrix; mitochondrion; negative regulation of apoptotic process; p53 binding; plasma membrane; poly(A) RNA binding; positive regulation of T cell activation; positive regulation of T cell mediated immune response to tumor cell; positive regulation of apoptotic process; positive regulation of interferon-alpha production; positive regulation of interferon-gamma production; positive regulation of interleukin-10 production; positive regulation of interleukin-12 production; positive regulation of interleukin-6 production; positive regulation of macrophage activation; protein binding; protein complex; protein maturation; protein refolding; protein stabilization; response to unfolded protein; secretory |  |

|     |       |              |        |             |                                                                                      |   |      |                                                                                                                                                      |                                                                                                                                                                                                                                                                                                                                                          |                                                                         |
|-----|-------|--------------|--------|-------------|--------------------------------------------------------------------------------------|---|------|------------------------------------------------------------------------------------------------------------------------------------------------------|----------------------------------------------------------------------------------------------------------------------------------------------------------------------------------------------------------------------------------------------------------------------------------------------------------------------------------------------------------|-------------------------------------------------------------------------|
|     |       |              |        |             |                                                                                      |   |      |                                                                                                                                                      | granule; single-stranded DNA binding; unfolded protein binding; viral process                                                                                                                                                                                                                                                                            |                                                                         |
| 281 | 3,01  | 7,413999736  | P25705 | ATPA_HUMAN  | ATP synthase subunit alpha, mitochondrial OS=Homo sapiens GN=ATP5A1 PE=1 SV=1        | 3 | mito | ATP synthase subunit alpha, mitochondrial                                                                                                            |                                                                                                                                                                                                                                                                                                                                                          |                                                                         |
| 165 | 6,35  | 14,5600006   | P06576 | ATPB_HUMAN  | ATP synthase subunit beta, mitochondrial OS=Homo sapiens GN=ATP5B PE=1 SV=3          | 3 | mito |                                                                                                                                                      |                                                                                                                                                                                                                                                                                                                                                          |                                                                         |
| 108 | 10,45 | 18,12999994  | P31930 | QCR1_HUMAN  | Cytochrome b-c1 complex subunit 1, mitochondrial OS=Homo sapiens GN=UQCRC1 PE=1 SV=3 | 5 | mito | Cytochrome b-c1 complex subunit 7 (Complex III subunit 7) (Complex III subunit VII) (QP-C) (Ubiquinol-cytochrome c reductase complex 14 kDa protein) | aerobic respiration; cellular metabolic process; mitochondrial electron transport, ubiquinol to cytochrome c; mitochondrial inner membrane; mitochondrial respiratory chain; mitochondrial respiratory chain complex III; oxidation-reduction process; oxidative phosphorylation; respiratory electron transport chain; small molecule metabolic process | Mitochondrion inner membrane.                                           |
| 147 | 7,81  | 16,779999943 | P22695 | QCR2_HUMAN  | Cytochrome b-c1 complex subunit 2, mitochondrial OS=Homo sapiens GN=UQCRC2 PE=1 SV=3 | 5 | mito | Cytochrome b-c1 complex subunit 2, mitochondrial (Complex III subunit 2) (Core protein II) (Ubiquinol-cytochrome-c reductase complex core protein 2) | aerobic respiration; cellular metabolic process; metal ion binding; metalloendopeptidase activity; mitochondrial inner membrane; mitochondrial respiratory chain complex III; mitochondrion; oxidative phosphorylation; protein binding; respiratory electron transport chain; small molecule metabolic process                                          | Mitochondrion inner membrane; Peripheral membrane protein; Matrix side. |
| 100 | 11,31 | 61,33000255  | P20674 | COX5A_HUMAN | Cytochrome c oxidase subunit 5A, mitochondrial OS=Homo sapiens GN=COX5A PE=1 SV=2    | 7 | mito | Cytochrome c oxidase subunit 5A, mitochondrial (Cytochrome c oxidase polypeptide Va)                                                                 | cellular metabolic process; cytochrome-c oxidase activity; electron carrier activity; hydrogen ion transmembrane transport; metal ion binding; mitochondrial inner membrane; respiratory electron transport chain; small molecule metabolic process                                                                                                      | Mitochondrion inner membrane.                                           |

|     |      |             |        |             |                                                                                     |   |      |                                                                                                                                                                                                                                                                                             |                                                                                                                                                                                                                                                                        |                                    |
|-----|------|-------------|--------|-------------|-------------------------------------------------------------------------------------|---|------|---------------------------------------------------------------------------------------------------------------------------------------------------------------------------------------------------------------------------------------------------------------------------------------------|------------------------------------------------------------------------------------------------------------------------------------------------------------------------------------------------------------------------------------------------------------------------|------------------------------------|
| 321 | 2,19 | 27,91000009 | P10606 | COX5B_HUMAN | Cytochrome c oxidase subunit 5B, mitochondrial OS=Homo sapiens GN=COX5B PE=1 SV=2   | 3 | mito | Cytochrome c oxidase subunit 5B, mitochondrial (Cytochrome c oxidase polypeptide Vb)                                                                                                                                                                                                        | cellular metabolic process; cytochrome-c oxidase activity; hydrogen ion transmembrane transport; metal ion binding; mitochondrial inner membrane; respiratory electron transport chain; respiratory gaseous exchange; small molecule metabolic process                 | Mitochondrion inner membrane.      |
| 286 | 2,89 | 33,7199986  | P14854 | CX6B1_HUMAN | Cytochrome c oxidase subunit 6B1 OS=Homo sapiens GN=COX6B1 PE=1 SV=2                | 2 | mito | Cytochrome c oxidase subunit 6B1 (Cytochrome c oxidase subunit VIb isoform 1) (COX VIb-1)                                                                                                                                                                                                   | cellular metabolic process; cytochrome-c oxidase activity; hydrogen ion transmembrane transport; mitochondrial inner membrane; mitochondrial intermembrane space; respiratory electron transport chain; small molecule metabolic process; substantia nigra development | Mitochondrion intermembrane space. |
| 277 | 3,12 | 27,70999968 | P14406 | CX7A2_HUMAN | Cytochrome c oxidase subunit 7A2, mitochondrial OS=Homo sapiens GN=COX7A2 PE=1 SV=1 | 2 | mito | Cytochrome c oxidase subunit 7A2, mitochondrial (Cytochrome c oxidase subunit VIIa polypeptide 2) (Cytochrome c oxidase subunit VIIa polypeptide 2 (Liver), isoform CRA_a)                                                                                                                  | cytochrome-c oxidase activity; mitochondrial respiratory chain                                                                                                                                                                                                         |                                    |
| 447 | 4,93 | 7,955999672 | P34931 | HS71L_HUMAN | Heat shock 70 kDa protein 1-like OS=Homo sapiens GN=HSPA1L PE=1 SV=2                | 4 | mito | Molecular chaperone implicated in a wide variety of cellular processes, including protection of the proteome from stress, folding and transport of newly synthesized polypeptides, activation of proteolysis of misfolded proteins and the formation and dissociation of protein complexes. |                                                                                                                                                                                                                                                                        |                                    |
| 447 | 4,96 | 7,955999672 | P08107 | HSP71_HUMAN | Heat shock 70 kDa protein 1A/1B OS=Homo sapiens GN=HSPA1A PE=1 SV=5                 | 4 | mito |                                                                                                                                                                                                                                                                                             |                                                                                                                                                                                                                                                                        |                                    |
| 326 | 2,15 | 5,541000143 | Q16891 | IMMT_HUMAN  | Mitochondrial inner membrane protein OS=Homo sapiens GN=IMMT PE=1 SV=1              | 2 | mito | Mitochondrial inner membrane protein (Cell proliferation-inducing gene 4/52 protein) (Mitofilin) (p87/89)                                                                                                                                                                                   | integral component of membrane; mitochondrial calcium ion homeostasis; mitochondrial inner membrane; mitochondrion; poly(A) RNA binding; protein binding; response to cold                                                                                             | Mitochondrion inner membrane.      |
| 419 | 1,74 | 6,617999822 | P35232 | PHB_HUMAN   | Prohibitin OS=Homo sapiens GN=PHB PE=1 SV=1                                         | 2 | mito | Prohibitin inhibits DNA synthesis. It has a role in regulating proliferation                                                                                                                                                                                                                |                                                                                                                                                                                                                                                                        |                                    |

|     |       |             |        |             |                                                                                                                |    |      |                                                                                                                                                                                                                                                                                                                                                                                                                                                                                                                                                                                                                                                                                                                                                                                                                                                                                                         |  |  |
|-----|-------|-------------|--------|-------------|----------------------------------------------------------------------------------------------------------------|----|------|---------------------------------------------------------------------------------------------------------------------------------------------------------------------------------------------------------------------------------------------------------------------------------------------------------------------------------------------------------------------------------------------------------------------------------------------------------------------------------------------------------------------------------------------------------------------------------------------------------------------------------------------------------------------------------------------------------------------------------------------------------------------------------------------------------------------------------------------------------------------------------------------------------|--|--|
| 251 | 3,92  | 7,842999697 | Q00796 | DHSO_HUMAN  | Sorbitol dehydrogenase<br>OS=Homo sapiens<br>GN=SORD PE=1 SV=4                                                 | 2  | mito |                                                                                                                                                                                                                                                                                                                                                                                                                                                                                                                                                                                                                                                                                                                                                                                                                                                                                                         |  |  |
| 282 | 2,96  | 5,649000034 | P49748 | ACADV_HUMAN | Very long-chain specific<br>acyl-CoA dehydrogenase,<br>mitochondrial OS=Homo<br>sapiens GN=ACADVL<br>PE=1 SV=1 | 2  | mito | activation of signaling<br>protein activity involved in<br>unfolded protein response;<br>acyl-CoA dehydrogenase<br>activity; cellular lipid<br>metabolic process; cellular<br>protein metabolic process;<br>endoplasmic reticulum<br>unfolded protein response;<br>energy derivation by<br>oxidation of organic<br>compounds; epithelial cell<br>differentiation; fatty acid<br>beta-oxidation; fatty acid<br>beta-oxidation using acyl-<br>CoA dehydrogenase; flavin<br>adenine dinucleotide<br>binding; long-chain-acyl-<br>CoA dehydrogenase<br>activity; mitochondrial<br>inner membrane;<br>mitochondrial matrix;<br>mitochondrial nucleoid;<br>mitochondrion; negative<br>regulation of fatty acid<br>biosynthetic process;<br>negative regulation of fatty<br>acid oxidation; regulation<br>of cholesterol metabolic<br>process; small molecule<br>metabolic process;<br>temperature homeostasis |  |  |
| 56  | 18,99 | 50,18000007 | P21796 | VDAC1_HUMAN | Voltage-dependent anion-<br>selective channel protein 1<br>OS=Homo sapiens<br>GN=VDAC1 PE=1 SV=2               | 10 | mito | Forms a channel through<br>the mitochondrial outer<br>membrane and also the<br>plasma membrane.                                                                                                                                                                                                                                                                                                                                                                                                                                                                                                                                                                                                                                                                                                                                                                                                         |  |  |
| 137 | 8,12  | 25,51000118 | P45880 | VDAC2_HUMAN | Voltage-dependent anion-<br>selective channel protein 2<br>OS=Homo sapiens<br>GN=VDAC2 PE=1 SV=2               | 7  | mito |                                                                                                                                                                                                                                                                                                                                                                                                                                                                                                                                                                                                                                                                                                                                                                                                                                                                                                         |  |  |
